1 Short title: Chromatin dynamics of phosphate-starved rice

2

3 Author for contact:

4 Aaron P. Smith

5 Associate Professor

6 Department of Biological Sciences

7 Louisiana State University

8 Baton Rouge, LA 70803

9

10 **Defining chromatin state transitions predicts a network that modulates cell wall**  
11 **remodeling in phosphate-starved rice shoots**

12  
13 Maryam Foroozani, Sara Zahraeifard, Dong-Ha Oh, Guannan Wang, Maheshi Dassanayake and  
14 Aaron Smith

15  
16 Department of Biological Sciences, Louisiana State University, Baton Rouge, LA, USA  
17

18  
19 One sentence summary: Combining data for three components of chromatin structure from  
20 control and phosphate-starved rice shoots reveals specific chromatin state transitions that  
21 correlate with subsets of functionally distinct differentially-expressed genes.  
22

23  
24 Author contributions: M.F. performed the experiments, analyzed the data, and wrote the article;  
25 S.Z provided technical assistance; D-H.O. and G.W. provided bioinformatics assistance; M.D.  
26 supervised the data analysis; A.S. conceived the project, supervised the experiments and data  
27 analysis, complemented the writing, and agrees to serve as the author responsible for contact and  
28 ensure communication  
29

30 Funding information: Funding was provided by a Plant Genome Research Program grant from  
31 the National Science Foundation (IOS-1127051).  
32

33 Current address: S. Zahraeifard, National Cancer Institute, Bethesda, MD, USA  
34

35 Author for contact: A. Smith, [apsmith@lsu.edu](mailto:apsmith@lsu.edu)  
36  
37

38 **Abstract**

39 Phosphorus (P) is an essential plant macronutrient vital to fundamental metabolic processes. Plant-  
40 available P is low in most soils, making it a frequent limiter of growth. Declining P reserves for  
41 fertilizer production exasperates this agricultural challenge. Plants modulate complex responses to  
42 fluctuating P levels via global transcriptional regulatory networks. Although chromatin structure  
43 plays a substantial role in controlling gene expression, the chromatin dynamics involved in  
44 regulating P homeostasis have not been determined. Here we define distinct chromatin states  
45 across the rice genome by integrating multiple aspects of chromatin structure, including the H2A.Z  
46 histone variant, H3K4me3 modification, and nucleosome positioning. In response to P starvation,  
47 40% of all protein-coding genes exhibit a transition from one chromatin state to another at their  
48 transcription start site. Several of these transitions are enriched in subsets of genes differentially  
49 expressed by P deficiency. The most prominent subset supports the presence of a coordinated  
50 signaling network that targets cell wall structure and is regulated in part via a decrease of  
51 H3K4me3 at the transcription start site. The P-starvation induced chromatin dynamics and  
52 correlated genes identified here will aid in enhancing P-use efficiency in crop plants, benefitting  
53 global agriculture.

## 54 Introduction

55 Phosphorus (P) is among the most limiting essential nutrients for plants. This is because  
56 the primary plant-available form of P, inorganic phosphate (Pi), has poor solubility in most soils  
57 (Holford, 1997). As a result, P fertilization of soils is required for crop plants to achieve adequate  
58 yields. Unfortunately, P fertilization can result in serious environmental concerns due to nutrient  
59 run-off, which will worsen in the future due to the non-renewable nature of P resources (Vance et  
60 al., 2003). It is, therefore, necessary to investigate the underlying mechanisms involved in  
61 regulating P homeostasis, so as to increase the efficiency of plants to acquire and recycle P. In  
62 order to tolerate low-Pi conditions and maintain optimal P levels, plants have evolved a number  
63 of physiological, morphological and biochemical responses, such as reduced growth, altered root  
64 system architecture, and secretion of organic acids, phosphatases, and nucleases to acquire more  
65 Pi (Secco et al., 2013). These responses are modulated by large transcriptional networks in which  
66 the MYB protein PHR1 and related transcription factors play key roles (Secco et al., 2013, Sun et  
67 al., 2016).

68 In eukaryotic cells, genes are complexed with core histones and other chromosomal  
69 proteins in the form of chromatin. The basic repeating unit of chromatin, the nucleosome, is  
70 composed of two copies of each of the four core histones H2A, H2B, H3, and H4 wrapped by 146  
71 bp of DNA (Luger et al., 1997). Therefore, chromatin structure is a key determinant of gene  
72 expression. Despite the fact that a large transcriptional cascade governs responses to low-Pi,  
73 relatively little is known regarding the associated chromatin dynamics, although evidence for  
74 chromatin-level mechanisms modulating Pi deficiency responses is emerging. Smith et al. (2010)  
75 demonstrated that mutation of the actin-related protein (ARP) gene, *ARP6*, which is a key  
76 component of the SWR1 complex that catalyzes H2A.Z deposition (Deal et al., 2007), resulted in  
77 decreased H2A.Z localization at a number of Pi deficiency response genes that were also de-  
78 repressed. These changes in H2A.Z and expression also occurred in Pi-deficient wild-type plants  
79 (Smith et al., 2010). Recently, we demonstrated a similar phenomenon in rice in which genome-  
80 wide H2A.Z distribution was altered similarly by Pi starvation or RNAi knock-down of *ARP6*  
81 (Zahraeifard et al., 2018). We also showed that deposition of rice H2A.Z in gene bodies largely  
82 resulted in down-regulation, whereas H2A.Z at the TSS was positively or negatively correlated  
83 with gene expression, depending on the particular Pi deficiency response genes affected. In a  
84 separate study we revealed that changes in nucleosome occupancy correlated with genes

85 differentially expressed by Pi starvation, implicating nucleosome remodelers in modulating Pi  
86 deficiency responses in rice (Zhang et al., 2018). Finally, two chromatin-related components have  
87 been shown to play roles in Pi-deficiency induced root hair growth in Arabidopsis. The *ALFIN-*  
88 *LIKE 6 (AL6)* gene encodes a plant homeodomain (PHD)-containing protein that recognizes H3K4  
89 trimethylation and appears to promote enhanced root hair growth during low-Pi conditions by  
90 targeting H3K4me3-marked target genes, such as *ETC1*, which functions in root hair cell  
91 patterning (Chandrika et al., 2013). The second factor necessary for normal induction of root hair  
92 growth in response to Pi deficiency is Arabidopsis *HDA19*, which encodes a histone deacetylase  
93 necessary for low-Pi root hair elongation through its role in regulating epidermal cell length (Chen  
94 et al., 2015).

95 Many mechanisms exist to alter the structural characteristics of chromatin, including  
96 positioning of nucleosomes, the presence of histone variants, and post-translational modifications  
97 of histones (Mariño-Ramírez et al., 2005, Venkatesh and Workman, 2015). Defining the patterns,  
98 or states, of chromatin structure by examining multiple marks simultaneously in their spatial  
99 context is more informative to understanding transcriptional changes in response to stress (Ernst  
100 and Kellis, 2012, Pan et al., 2017). This is exemplified by two recent studies in rice that defined  
101 distinct chromatin states by combining multiple histone marks and showed various associations  
102 between particular chromatin states and genes differentially expressed by ionizing radiation (Pan  
103 et al., 2017) or salinity stress (Zheng et al., 2019). In contrast, no studies have defined chromatin  
104 state transitions linked to Pi deficiency responses in plants. Herein we characterized the impact of  
105 Pi starvation on the major histone mark, H3K4me3, as well as on chromatin states generated from  
106 the combined occupancy data of H3K4me3, H2A.Z, and nucleosomes. The data reveal several  
107 distinct chromatin state transitions that accompany expression changes of key subsets of Pi  
108 starvation-response genes.

109

## 110 **Results:**

### 111 **H3K4me3 is prominent at the 5' end of rice protein-coding genes and co-localizes with the** 112 **H2A.Z histone variant**

113 Previously we demonstrated that dynamics of nucleosome occupancy (Zhang et al., 2018)  
114 and H2A.Z deposition (Zahraeifard et al., 2018) were linked to genes differentially expressed in

115 response to phosphate (Pi) starvation in rice shoots. The primary goal herein was to evaluate the  
116 combined role of nucleosome occupancy, H2A.Z and another major determinant of chromatin  
117 structure, H3K4me3, in modulating responses to Pi starvation. We began by determining the  
118 genome distribution of H3K4me3 via ChIP-seq on shoots from 36-day rice (*Oryza sativa* ssp.  
119 japonica cv. Nipponbare) seedlings (Supplemental Table S1). Genes were categorized into four  
120 groups based on the MSU7 genome annotation: protein-coding genes (PCG), ‘pseudogenes’ (PSG,  
121 i.e. annotated genes that are neither expressed nor transposable element-related), transposable  
122 element-related genes that are expressed (TEG), and transposable element-related genes not  
123 expressed (TE) (Kawahara et al., 2013, Zhang et al., 2018). A prominent H3K4me3 peak was  
124 present immediately downstream of the transcription start sites (TSS) of PCG (Figure 1A), similar  
125 to previous studies (Zhang et al., 2009, Van Dijk et al., 2010, Du et al., 2013, Zong et al., 2013).  
126 In contrast to PCG, H3K4me3 abundance was relatively low at PSG, TEG, and TE (Figure 1A).  
127 Next we examined whether sub-groups of PCG exhibited different H3K4me3 patterns. Sorting all  
128 PCG according to size revealed a strong correlation between H3K4me3 and gene length  
129 (Supplemental Figure S1A,B), indicating that the general pattern of H3K4me3 among all PCG is  
130 relatively consistent (i.e. a major peak of H3K4me3 at the TSS). Although a TSS-localized peak  
131 of H3K4me3 was observed at virtually all PCG, the abundance of the peak varied. Clustering  
132 analysis at a 100-bp window across the TSS revealed 4 distinct clusters of H3K4me3 abundance  
133 (Supplemental Figure S1C,D). Gene Ontology (GO) enrichment analysis showed that the clusters  
134 with high and moderate abundance were enriched (FDR<0.05) with housekeeping genes, whereas  
135 the clusters with relatively low H3K4me3 abundance were enriched in stress-responsive genes  
136 (Supplemental Dataset 1).

137 The H3K4me3 localization at different gene types (Figure 1A) are similar to those we  
138 recently demonstrated for the H2A.Z histone variant (Zahraeifard et al. 2018; Figure 1B). A key  
139 difference is that abundance of H3K4me3 is relatively higher than H2A.Z across TEG and TE. To  
140 further examine the association between H3K4me3 and H2A.Z we first computed a correlation  
141 coefficient using deepTools (Ramírez et al., 2016), which showed that both chromatin marks were  
142 correlated across the rice genome ( $r = 0.77$ ; Pearson correlation coefficient; Figure 1C). Next we  
143 identified and compared distinct H3K4me3 and H2A.Z peaks using SICER (Zang et al., 2009) and  
144 BEDTools (Quinlan and Hall, 2010). This identified 32,886 H3K4me3 peaks and 44,804 H2A.Z

145 peaks, of which 30,813 (93% of H3K4me3 peaks) overlapped (Figure 1D), showing substantial  
146 co-localization of these chromatin marks.

### 147 **H3K4me3 and H2A.Z abundance have distinct correlations with gene expression in rice**

148 To compare H3K4me3 abundance with gene expression, we analyzed our previously  
149 obtained RNA-seq data (Zahraeifard et al., 2018) from shoot tissues of 36-day rice seedlings  
150 (Supplemental Table S1). PCG were ranked according to FPKM and divided into five expression  
151 quintiles, as well as a sixth group of genes that were not expressed (i.e. FPKM = 0). We found a  
152 clear, positive correlation between transcript abundance and H3K4me3 localization around the  
153 TSS (Figure 2A,B), consistent with studies from a variety of species (Bernstein et al., 2002,  
154 Santos-Rosa et al., 2002, Barski et al., 2007, Zhang et al., 2009, Van Dijk et al., 2010). In contrast,  
155 transcript abundance exhibited a general negative correlation with TES- and gene body-localized  
156 H3K4me3 (Figure 2A,B). Genes exhibiting no expression were severely depleted in H3K4me3 at  
157 the TSS, but had a moderate level of gene-body H3K4me3. Next, we compared the correlation  
158 between H3K4me3 abundance and gene expression with that of H2A.Z (Zahraeifard et al.,  
159 2018)(Figure 2C,D). As with H3K4me3, non-expressed genes were deficient in H2A.Z at the TSS,  
160 but contained moderate levels of gene-body H2A.Z. However, for the expression quintiles, H2A.Z  
161 exhibited a general negative correlation with expression at both the TSS and, especially, in the  
162 gene body. Together these results show distinct and overlapping genic patterns of H3K4me3 and  
163 H2A.Z, and suggest that the ratio of the two marks is important in the modulation of gene  
164 expression.

### 165 **Pi-starvation impacts H3K4me3 localization**

166 To evaluate a potential role for H3K4me3 in modulating Pi-deficiency responses, we  
167 carried out H3K4me3 ChIP-seq on shoots from plants subjected to a 24-hour Pi-deficiency  
168 treatment (Supplemental Table S1). As shown in Supplemental Figure S2, Pi-deficiency altered  
169 H3K4me3 distribution at PCG, such that the prominent 5' peak was reduced. These data along  
170 with our prior studies (Zahraeifard et al., 2018, Zhang et al., 2018) indicate that nucleosome  
171 occupancy, H2A.Z, and H3K4me3 each exhibit distinct changes in response to Pi starvation.

172

173 **H3K4me3, H2A.Z, and nucleosome occupancy define five chromatin states in the rice**  
174 **genome**

175 It is becoming increasingly clear that examining multiple chromatin marks simultaneously  
176 provides a more robust picture of the dynamic chromatin structure linked to various developmental  
177 processes and responses to stimuli (Pan et al., 2017, Yan et al., 2019). Therefore, we integrated  
178 our H3K4me3 ChIP-Seq, H2A.Z ChIP-Seq (Zahraeifard et al., 2018) and MNase-Seq data sets  
179 (Zhang et al., 2018) to define distinct chromatin states using ChromHMM (Ernst and Kellis, 2012).  
180 ChromHMM employs a multivariate Hidden Markov Model that scores the presence or absence  
181 of each chromatin mark to determine the major recurring combinatorial and spatial patterns of  
182 marks, i.e. chromatin states. ChromHMM identified five chromatin states (CS), each  
183 distinguishable from the others by differential enrichment of one or more of the marks tested  
184 (Figure 3A). CS1 and CS2 were each deficient in both H2A.Z and H3K4me3, CS3 was enriched  
185 in only H2A.Z, CS4 was enriched in both H2A.Z and H3K4me3, and CS5 was enriched in only  
186 H3K4me3. Regarding nucleosome density, CS2 and CS3 had moderately higher nucleosome  
187 enrichment compared to the other 3 states. Next we mapped the distribution of the five chromatin  
188 states across the genome, which revealed biases with a number of genomic features (Figure 3B,D).  
189 CS1 was the major chromatin state, accounting for 63 % of the rice genome, and was enriched at  
190 TE and TEG. It should be noted that highly repetitive regions of the genome were likely designated  
191 CS1 due to low numbers of mappable reads rather than bona fide depletion of the chromatin marks  
192 examined. TE and TEG were also enriched in CS2 and CS5. This means that the transposable  
193 element-related loci were either deficient in both H2A.Z and H3K4me3 or contained H3K4me3  
194 only. In contrast, PSG were enriched in CS2 and CS3, consistent with depletion of both H2A.Z  
195 and H3K4me3 or enrichment of only H2A.Z. Finally, PCG were enriched in CS4, consistent with  
196 enrichment of both H3K4me3 and H2A.Z. To more specifically characterize PCG, we calculated  
197 enrichments at the TSS, TES, and 1kb regions that encompass the TSS or TES (TSS 1kb region:  
198 200 bp upstream to 800 bp downstream of the TSS; TES 1kb region: 800 bp upstream to 200 bp  
199 downstream of the TES; Figure 3B). Compared to all bins within PCG, the TSS was more enriched  
200 in CS4, CS5, and CS3, whereas the TES was more enriched in CS3 and less enriched in CS4.  
201 These results indicate for PCGs generally an overall high occupancy of H2A.Z and/or H3K4me3  
202 at the TSS, but an enrichment of only H2A.Z at the TES.



## 203 **Pi starvation has a dramatic impact on chromatin structure**

204 To characterize the impact of Pi starvation on chromatin structure we compared the  
205 distribution of chromatin states between control and Pi-deficiency (–Pi) conditions. First we  
206 measured the genome-wide coverage changes for each chromatin state by calculating the fold  
207 change in the total number of genomic bins in the –Pi sample relative to the control. As shown in  
208 Supplemental Figure S3, the –Pi sample had 2.1-fold more CS3 and 1.4-fold less CS4 compared  
209 to control. This suggested a global increase of H2A.Z and/or decrease of H3K4me3. Next we  
210 analyzed the enrichment of each chromatin state within the four gene types (Figure 3C,D). In  
211 response to Pi starvation, TE and TEG increased in CS1, but decreased in CS2 and CS5, consistent  
212 with a loss of H3K4me3. On the other hand, PSG and PCG did not exhibit any major shifts overall  
213 in response to Pi deficiency, but at the TSS of PCG, CS4 decreased and CS5 increased. Also, at  
214 the TES proximal region of PCG, CS4 decreased and CS3 increased. Together this reveals an  
215 overall trend whereby, at PCG, Pi deficiency leads to decreased H2A.Z at the TSS and decreased  
216 H3K4me3 near the TES.

217 To examine the chromatin state transitions of PCG in more detail, we compared the  
218 chromatin state of each PCG at its TSS (i.e. the 200-bp bin containing the TSS) in control and –Pi  
219 samples (Figure 4). Over 40 % of PCG exhibited a transition at their TSS in response to Pi  
220 starvation. The largest groups of transitions were CS4 to CS3 (n = 4,088), CS4 to CS5 (n = 2,355),  
221 and CS5 to CS1 (n = 2,496). Gene Ontology (GO) enrichment analysis showed significantly  
222 enriched GO terms (FDR < 0.05) for eight of the transition groups (Supplemental Dataset 2).  
223 Because of the inherent redundancy of GO term enrichment analysis, we used GOMCL (Wang et  
224 al., in review) to enhance the functional annotations of the enriched GO terms for the three largest  
225 groups of CS transitions. GOMCL employs Markov Clustering to identify clusters of GO terms  
226 based on the proportion of overlap among terms. As shown in Figure 4, the enriched GO terms for  
227 CS4-CS3 genes fell into five GOMCL clusters, including transcription factor activity, response to  
228 endogenous stimulus, cell wall, oxygen binding, and response to extracellular stimulus. In contrast,  
229 CS4-CS5 genes were enriched in GO terms defined by nine GOMCL clusters, which among other  
230 functional categories, were related to translation and gene expression, nuclear functions, plastid  
231 functions, nucleic acid metabolism, development, and RNA binding. Interestingly, CS5-CS1 genes  
232 shared essentially the same enriched GO terms (Supplemental Dataset 2) and GOMCL clusters



233 (Figure 4) as CS4-CS5 genes. One explanation for this is that the CS5-CS1 and CS4-CS5  
234 transitions are frequently found together at the TSS. Indeed, examination of the bins that flank the  
235 TSS (Supplemental Figure S4) showed that CS5-CS1 genes were approximately four times more  
236 likely than random to exhibit a CS4-CS5 transition in the bin downstream of the TSS (p-value <  
237 0.001). Similarly, the CS4-CS5 genes were 3.5-fold more likely to contain a CS5-CS1 transition  
238 upstream of the TSS (p-value < 0.001). In contrast, CS5-CS1 genes with a CS4-CS5 upstream bin,  
239 and CS4-CS5 genes with a CS5-CS1 downstream bin were similar to random or under-represented,  
240 respectively. Thus, the identification of subgroups of functionally similar genes with CS5-CS1 and  
241 CS4-CS5 transitions at their TSS is reflective of these genes containing a specific pair of transitions  
242 (CS5-CS1 + CS4-CS5, 5'-3') at the TSS.

### 243 **Chromatin state transitions correlate with differential expression of Pi deficiency-responsive** 244 **genes**

245 We analyzed our recent RNA-seq experiments (Zahraeifard et al., 2018; Supplemental  
246 Table S1) to investigate the relationship between gene expression and chromatin state transitions  
247 in response to Pi starvation. Differential expression analysis with DESeq2 identified 1385  
248 differentially-expressed genes (DEGs) in response to Pi starvation, 694 up-regulated and 691  
249 down-regulated (adjusted P-value < 0.001; Supplemental Figure S5, Supplemental Dataset 3) GO  
250 terms enriched for up-regulated genes included response to stress, lipid metabolic process, and  
251 signal transduction, whereas down-regulated genes were enriched in growth, cell-cell signaling,  
252 and lipid, carbohydrate, and secondary metabolic processes (Supplemental Table S2,  
253 Supplemental Figure S5B,C). Although lipid metabolism was overrepresented in both groups of  
254 DEGs, genes linked to carotenoid biosynthesis and alpha-Linolenic acid metabolism were among  
255 the up-regulated DEGs, whereas cutin, suberin, and wax biosynthesis were among the down-  
256 regulated DEGs. Overall, the functional categories of these DEGs were similar to those from  
257 previous transcriptome studies of Pi-deficient plants (Thibaud et al., 2010, Cai et al., 2013, Secco  
258 et al., 2013, Zahraeifard et al., 2018).

259 To determine whether any chromatin state transitions were over- or under-represented  
260 among the DEGs, we quantified the significance of overlap via bootstrapping analyses (1000  
261 iterations; binomial test, p-value < 0.001; Figure 5). These analyses revealed several significant  
262 biases between CS transitions and DEGs. First, down-regulation of gene expression correlated

263 with a gain of H2A.Z, as indicated by enrichment of down-regulated genes with CS1-CS3 and  
264 CS2-CS3 transitions and under-representation of up-regulated genes with a CS2-CS3 transition.  
265 Reciprocally, up-regulation of gene expression correlated with a loss of H2A.Z, as indicated by  
266 enrichment of up-regulated genes among CS3-CS1 genes. These observations support a role for  
267 H2A.Z as a repressive chromatin mark during Pi starvation, in which some genes are repressed by  
268 the deposition of H2A.Z, whereas other genes are induced (de-repressed) by its removal. Second,  
269 genes containing H2A.Z and H3K4me3 that exhibited decreases in both marks in response to Pi  
270 deficiency (CS4-CS1) were also enriched among up-regulated genes. This suggests a negative role  
271 for not only H2A.Z, but also H3K4me3, in which the loss of both marks from this group of genes  
272 results in their de-repression. Third, up- and down-regulated DEGs were both enriched among  
273 CS4-CS3 transition genes (i.e. those with a decrease in H3K4me3 but maintenance of H2A.Z).  
274 Interestingly, this suggests a possible dual role of H3K4me3 in Pi-responsive gene modulation.  
275 Finally, the other two prominent groups of transitions, CS5-CS1 and CS4-CS5, which contain  
276 many translation-related genes, were under-represented among down-regulated DEGs. This  
277 indicates that genes exhibiting these transitions, or pair of transitions (Supplemental Figure S4), at  
278 the TSS are unlikely to be differentially expressed after 24-hours of Pi deficiency. Because a  
279 number of translation-related genes were previously shown to be down-regulated by long-term  
280 (21-day) Pi deficiency in rice shoots (Secco et al., 2013), we carried out a bootstrapping analysis  
281 to test whether our CS5-CS1 and CS4-CS5 genes were enriched among those DEGs. Indeed, both  
282 CS5-CS1 and CS4-CS5 groups were enriched ( $p$ -value  $< 0.01$ ) among genes down-regulated by  
283 long-term Pi deficiency (Supplemental Figure S6). This suggests that the chromatin dynamics  
284 observed at these genes after 24 hours of Pi starvation is a prelude to decreased transcript  
285 abundance not observable until after a longer duration of Pi deficiency.

286 In addition to the biases between DEGs and chromatin state transitions, there were also  
287 biases to groups of genes that did not transition (Figure 5). Both up- and down-regulated DEGs  
288 were significantly enriched among CS3 genes that did not transition (i.e. CS3-CS3), and were  
289 under-represented among CS1-CS1 and CS5-CS5 genes. Furthermore, up-regulated DEGs were  
290 enriched among CS4-CS4 genes and under-represented among CS2-CS2 genes. These results  
291 show that responsive genes are likely to contain H2A.Z, which is consistent with previous reports  
292 (Coleman-Derr and Zilberman, 2012, Zahraeifard et al., 2018). Taken together, these biases

293 demonstrate that specific chromatin dynamics at the TSS are linked to subsets of genes  
294 differentially expressed by Pi starvation.

295 **Differentially-expressed genes exhibiting a CS4 to CS3 chromatin transition suggest a**  
296 **coordinated Pi-deficiency regulatory network targeting the apoplast**

297 As shown above, the largest group of genes exhibiting a chromatin state shift in response  
298 to Pi deficiency was the CS4-CS3 group (Figure 4, Supplemental Dataset 2). These genes were  
299 also significantly enriched among both up- and down-regulated DEGs (Figure 5), and GO term  
300 enrichment analysis of the DEGs indicated functions linked to the cell wall, responses to biotic  
301 stress, and catalytic activity (Supplemental Figure S7). Due to the relatively limited GO term  
302 assignments for rice loci, we carried out extensive data mining on the CS4-CS3 DEGs, which  
303 allowed us to assign putative functional and subcellular localization information to 178 (91%) of  
304 the 196 DEGs (Supplemental Dataset 4). These DEGs encode components with putative functions  
305 in signal transduction (37%), cell wall structure (23%), lipid composition (13%), transcription  
306 regulation (10%), secondary metabolism (9%), primary metabolism, or cell growth (3%), which  
307 are mostly targeted to the apoplast (31%), plasma membrane (28%), nucleus (18%), cytosol (10%),  
308 or plastid (6%) (Figure 6A). Strikingly, more than half (53%) of the CS4-CS3 DEGs are predicted  
309 to encode proteins targeted to the apoplast or plasma membrane, and have functions in signaling  
310 or cell wall and lipid composition. Among this group are a number of pectinases, arabinogalactan  
311 proteins (AGPs), and expansins that mostly are down-regulated by the 24-hour Pi deficiency  
312 treatment (Figure 6B, Supplemental Dataset 4). A previous study in *Arabidopsis* identified a  
313 similar response of cell wall hydrolytic enzyme-encoding loci in roots subjected to Pi-deficiency  
314 treatments of 1, 6, and/or 24 hours (Lin et al., 2011). Together this suggests that modification of  
315 the cell wall is an early and prominent response to Pi starvation in roots and shoots across plant  
316 species. In addition to the down-regulation of cell wall-related components was a large group of  
317 signaling components, including many receptor-like kinases (RLKs), that were predominantly up-  
318 regulated (Figure 6B, Supplemental Dataset 4). One of the RLKs is a *Catharanthus roseus* RLK1-  
319 like kinase orthologous to *Arabidopsis* FERONIA (FER), which has been shown to regulate cell  
320 expansion in response to diverse developmental and environmental cues (Liao et al., 2017). For  
321 example, during salinity stress, FER maintains cell wall integrity, and is necessary for root growth  
322 recovery (Feng et al., 2018). Recently it was demonstrated that FER is one component of a

323 signaling module that transduces cell-wall signals during salt stress (Zhao et al., 2018). In the  
324 absence of salt stress, a group of apoplastic leucine-rich repeat extensins (LRX) bind to RAPID  
325 ALKALINIZATION FACTOR (RALF) peptides. In response to salt stress, LRX and RALF  
326 dissociate, and RALF peptides bind FER. This results in FER internalization and, subsequently,  
327 inhibition of growth and initiation of stress responses. Calcium transients and SITE-1 PROTEASE  
328 (S1P) activity also play roles in RALF/FER signaling (Stegmann et al., 2017, Feng et al., 2018).  
329 Notably, our CS4-CS3 DEG list also contains genes encoding six RALF peptides (out of 14;  
330 (Campbell and Turner, 2017) an LRX, several Ca<sup>2+</sup> transport-related components (e.g. Ca<sup>2+</sup>  
331 ATPase and calmodulin), and two S1P proteases (Supplemental Dataset 4). In addition to the  
332 signaling and cell wall components were a number of transcription factors among the CS4-CS3  
333 DEGs, including five AP2 superfamily factors, two HLH factors, and two WRKY transcription  
334 factors. These represent families of transcription factors known to be responsive to a number of  
335 biotic and abiotic stressors. It is tempting to speculate that these regulatory genes, along with the  
336 differentially-expressed CS4-CS3 structural genes comprise a transcriptional regulatory network  
337 aimed at transducing Pi deficiency signals and initiating reduced cellular growth and tolerance to  
338 low Pi (Figure 7).

339

## 340 **Discussion**

### 341 **H3K4me3 and H2A.Z exhibit overlapping and divergent localization patterns**

342 Despite being widely recognized as marks of active transcription, assigning specific roles  
343 for H3K4me3 and H2A.Z in regulating transcription has been challenging. For instance, H3K4me3  
344 is often assumed to promote transcription, but loss or severe depletion of H3K4me3 levels results  
345 in relatively few gene expression changes (Clouaire et al., 2012, Margaritis et al., 2012). Also,  
346 whereas loss of H3K4me3 at most genes has no impact on expression, H3K4me3 has been linked  
347 to both activation and repression of subsets of genes (Weiner et al., 2015, Cano-Rodriguez et al.,  
348 2016). Like H3K4me3, H2A.Z is often associated with gene activity, but plays a complex role in  
349 modulating gene expression. Evidence indicates that H2A.Z acts to both promote and repress gene  
350 expression, depending on the environmental or developmental context, genic location, and relevant  
351 loci (Deal et al., 2007, Zilberman et al., 2008, March-Díaz and Reyes, 2009, Kumar and Wigge,  
352 2010, Smith et al., 2010, Berriri et al., 2016, Sura et al., 2017, Zahraeifard et al., 2018). Interactions

353 among multiple chromatin modifications add complexity to identifying specific chromatin-level  
354 mechanisms that modulate gene expression, particularly in light of contradictory findings. For  
355 example, Arabidopsis H2A.Z has been proposed to facilitate H3K4 trimethylation at miR156 loci  
356 (Xu et al., 2018) but antagonize H3K4me3 abundance at anthocyanin biosynthetic genes (Cai et  
357 al., 2019). Thus there is a need to investigate multiple aspects of chromatin structure in order to  
358 gain insight into chromatin-level mechanisms that impact gene expression.

359 Herein we used ChromHMM to combine our H3K4me3 ChIP-Seq data from this study  
360 with our previous H2A.Z ChIP-Seq (Zahraeifard et al., 2018) and MNase-Seq (Zhang et al., 2018)  
361 data to define 5 chromatin states (CS1-CS5) in rice shoots. Genic regions were enriched in CS4,  
362 which is characterized by moderate nucleosome occupancy and relatively high levels of H2A.Z  
363 and H3K4me3. The TSS of protein-coding genes were also enriched in CS4, as well as CS3 and  
364 CS5, which contain only H2A.Z or H3K4me3, respectively. In contrast, the TES of protein-coding  
365 genes was only enriched in CS3. This suggests that H3K4me3 functions mostly at the TSS,  
366 whereas H2A.Z functions across the gene. This is generally consistent with previous reports on  
367 the functions of H3K4me3 and H2A.Z. Studies in a number of organisms have shown that  
368 H3K4me3 localizes near the TSS of active protein-coding genes (Santos-Rosa et al., 2002, Liu et  
369 al., 2005, Bernstein et al., 2006, Barski et al., 2007, Zhang et al., 2009, Van Dijk et al., 2010, Du  
370 et al., 2013, Zong et al., 2013). Our data further support this by showing a prominent peak of  
371 H3K4me3 at the TSS of rice PCG (Figure 1A) that is positively correlated with basal gene  
372 expression (Figure 2). H2A.Z is also abundant at the TSS of PCG, but appears to play roles in gene  
373 expression by localizing to gene bodies and the TES, as well (Coleman-Derr and Zilberman, 2012,  
374 Sura et al., 2017, Zahraeifard et al., 2018). In contrast to H3K4me3, TSS-localized H2A.Z is  
375 negatively correlated with basal expression (Figure 2; (Zilberman et al., 2008, Coleman-Derr and  
376 Zilberman, 2012, Yelagandula et al., 2014, Dai et al., 2017, Zhang et al., 2017, Zahraeifard et al.,  
377 2018). Interestingly, our data show that both H2A.Z and H3K4me3 localized downstream of the  
378 TSS region are negatively correlated with expression. Previous studies have reported this  
379 phenomenon for H2A.Z (Zilberman et al., 2008, Coleman-Derr and Zilberman, 2012, Sura et al.,  
380 2017), but Arabidopsis H3K4me3 was shown to be positively regulated with expression (Van Dijk  
381 et al., 2010). This may reflect a difference in the role of H3K4me3 at the 3' genic region in different  
382 plant species. On the other hand, a H3K4me3 profile of genes from an allotetraploid cotton  
383 genotype generally showed a negative correlation with expression, whereas a diploid cotton

384 genotype in the same study exhibited a positive correlation (You et al., 2017). H3K4me3 at the  
385 TES was reported to play a role in modulating antisense transcription, thereby repressing sense  
386 transcription (Ponting et al., 2009, Cui et al., 2012). Therefore, genotypic or cell type-dependent  
387 differences in antisense transcription may contribute to the correlation of TES-localized H3K4me3  
388 with sense transcription. Further investigation is required to understand the nature of the  
389 differences in 3' H3K4me3-dependent regulation of gene expression across samples and species.

### 390 **Pi-starvation induced chromatin dynamics correlate with gene repression and induction**

391 Often, the disruption of chromatin remodelers, such as H3K4 methyltransferases, through  
392 mutagenesis do not have substantial impacts on global steady-state transcription (Guo et al., 2010,  
393 Chen et al., 2017, Howe et al., 2017). On the other hand, a number of studies have identified  
394 significant roles for particular chromatin remodelers in differential expression in response to  
395 environmental stimuli (Ding et al., 2011, Ding et al., 2012, Weiner et al., 2015). Our data support  
396 this by revealing that more than 40% of all rice PCG in shoots exhibit a chromatin state transition  
397 at their TSS in response to a 24-hour Pi deficiency treatment, and that several specific transitions  
398 strongly correlate with subgroups of genes differentially-expressed by Pi starvation. Indeed, our  
399 results suggest that multiple chromatin remodelers are responsive to Pi deficiency and influence  
400 expression of distinct subsets of target genes.

401 Genes with CS1-CS3 or CS2-CS3 transitions exhibit increases in nucleosome occupancy  
402 and H2A.Z deposition in response to Pi starvation, and are enriched in down-regulated genes,  
403 whereas CS3-CS1 genes, which exhibit decreases in nucleosome occupancy and H2A.Z, are  
404 enriched in up-regulated genes. These correlations are consistent with a repressive role for H2A.Z  
405 at the TSS in modulating Pi deficiency response genes. This is consistent with our recent work in  
406 rice (Zahraeifard et al., 2018) and previous reports in Arabidopsis (Dai et al., 2017, Sura et al.,  
407 2017), which all provide evidence for H2A.Z acting as a repressor of expression when localized  
408 at gene bodies or the TSS. Work in Arabidopsis also showed general co-localization of H2A.Z and  
409 H3K4me3 in promoter regions, but a negative correlation of the two marks at the TSS of genes  
410 exhibiting relatively high H2A.Z, as well as a positive correlation between nucleosome occupancy  
411 and H2A.Z at the +1 nucleosome, suggesting that H2A.Z deposition at the +1 nucleosome is linked  
412 to high nucleosome occupancy, low H3K4me3, and low gene accessibility (Dai et al., 2017). Our  
413 data bolster support for a model where H2A.Z at the TSS, likely the +1 nucleosome, regulates a



414 subset of Pi-deficiency response genes that contain low H3K4me3 and relatively low basal  
415 expression. In response to Pi starvation, H2A.Z is either removed or deposited, resulting in de-  
416 repression (CS3-CS1) or repression (CS1-CS3/CS2-CS3), respectively. Similar to CS3-CS1,  
417 genes with a CS4-CS1 transition, which exhibit a loss of both H2A.Z and H3K4me3, are enriched  
418 in up-regulated genes (Figure 6). These genes tend to be more highly expressed during control  
419 conditions than CS3 genes, and therefore have a stronger requirement for H3K4me3 for basal  
420 expression. In response to Pi starvation, the combined loss of H2A.Z and H3K4me3 may reflect  
421 some dependence of H3K4me3 on H2A.Z at these genes, similar to how H2A.Z was suggested to  
422 facilitate H3K4me3 deposition at two miR156-encoding genes in Arabidopsis (Xu et al., 2018).

423         Among the gene groups that exhibit chromatin state transitions, the CS4-CS3 group  
424 contains the largest number of genes, and is characterized by a loss of H3K4me3, but maintenance  
425 of H2A.Z, during Pi starvation. Interestingly, these genes are enriched among both up- and down-  
426 regulated genes, indicating that loss of H3K4me3 is linked to gene activation and repression during  
427 Pi deficiency. In contrast to H2A.Z, H3K4me3 is generally not recognized as playing a negative  
428 role in gene expression. Studies in a variety of plant species and tissues have examined the change  
429 in genic levels of H3K4me3 in response to environmental stressors (Tsuji et al., 2006, Sokol et al.,  
430 2007, Kim et al., 2008, Van Dijk et al., 2010, Jaskiewicz et al., 2011, Zeng et al., 2019). These  
431 studies generally reported increases in H3K4me3 at genes up-regulated by stress. However, most  
432 of the studies examined relatively small numbers of genes, and the genome-level studies that  
433 compared average H3K4me3 genic profiles between control and stressed samples actually found  
434 substantial decreases in 5' localization of H3K4me3 in response to stress (Zong et al., 2013, Zeng  
435 et al., 2019). We observed a similar effect when comparing the H3K4me3 profiles for all PCG  
436 between control and Pi deficiency conditions (Figure S2). One explanation for our CS4-CS3 genes  
437 being linked to both induction and repression is that the TSS of the corresponding genes contain  
438 bivalent histone modifications. Bivalent domains are characterized by containing both active and  
439 repressive histone modifications. First described in mouse embryonic stem cells were bivalent  
440 domains containing H3K4me3 and H3K27me3, in which H3K4me3 is proposed to poise genes for  
441 activation, whereas H3K27me3 maintains the genes in a repressed state (Bernstein et al., 2006). A  
442 recent study in potato tuber found an association between genes containing the bivalent H3K4me3  
443 and H3K27me3 marks and differential expression in response to cold stress (Zeng et al., 2019).  
444 Interestingly, the bivalent mark was enriched among up-regulated genes linked to stress responses,



445 as well as down-regulated genes linked to developmental processes. The authors proposed that the  
446 bivalent H3K4me3-H3K27me3 domain confers greater accessibility to regulatory proteins that can  
447 induce or repress genes in response to cold stress. A similar phenomenon might explain our  
448 observed link between CS4-CS3 genes and both up- and down-regulation of genes in response to  
449 Pi starvation. A decrease in H3K4me3 at the TSS may reflect a switch from nucleosomes modified  
450 with only H3K4me3 to nucleosomes containing both H3K4me3 and H3K27me3. This would favor  
451 enhanced DNA accessibility, which could facilitate the targeting of transcriptional machinery for  
452 induction or repression by the appropriate transcriptional machinery. Recently, an interaction  
453 between H2A.Z deposition and H3K27 tri-methylation was reported in Arabidopsis, in which  
454 H2A.Z deposition promotes H3K27 tri-methylation (Carter et al., 2018). It is possible that the  
455 maintenance of H2A.Z at the CS4-CS3 genes is required for proper H3K27me3 deposition at the  
456 bivalent marks. Future experiments that examine H3K27me3 localization would shed light on this  
457 hypothesis.

#### 458 **Differential expression of cell wall-related genes correlates with decreased H3K4me3 and** 459 **maintenance of H2A.Z**

460 Cell walls provide rigidity to plant cells but are also restrictive to cell expansion. Thus,  
461 cells must simultaneously weaken cell wall structure and maintain turgor and cell integrity to  
462 achieve growth (Voxeur et al., 2016). Correspondingly, plants must employ signaling mechanisms  
463 aimed at regulating cell wall structure in response to developmental and environmental cues.  
464 Several plasma-membrane localized receptor-like kinases, such as FERONIA (FER), have been  
465 implicated in cell-wall integrity sensing in response to a variety of environmental stressors (Liao  
466 et al., 2017). The majority of our CS4-CS3 DEGs encode putative apoplastic or plasma membrane  
467 proteins with predicted roles in signaling and cell wall composition. The signaling genes were  
468 mostly up-regulated, whereas the cell wall related genes were largely down-regulated. Comparing  
469 the transcriptomic profile of the CS4-CS3 DEGs to public transcriptome studies using  
470 Genevestigator (Hruz et al., 2008) revealed substantial overlap with several pairwise comparisons  
471 from a previous study on rice lamina joint development (Zhou et al., 2017). Comparisons between  
472 older stages of development (maturation or post-maturation) with a younger stage showed similar  
473 expression profiles as our CS4-CS3 Pi-deficiency DEGs (not shown). Interestingly, cell-wall  
474 thickening is a prominent feature during younger stages of lamina joint development, and this

475 declines over time. This may suggest that Pi starvation results in decreased cell wall thickening,  
476 or more generally, a decrease in cell elongation. Transcriptomic profiles of several biotic and  
477 abiotic (e.g. salinity and heat) stressors also showed high similarity to our CS4-CS3 DEG profile,  
478 suggesting the apparent apoplastic signaling network overlaps with multiple stressors. Our CS4-  
479 CS3 DEG list contains many orthologs of Arabidopsis components involved in salinity stress  
480 responses, including FER, LRX, RALF (Zhao et al., 2018). It is of interest to evaluate whether the  
481 rice orthologs exhibit similar functions in response to stressors including salinity and Pi starvation.

### 482 **A distinct pair of chromatin state transitions may poise translation-related genes for** 483 **repression**

484 Following the CS4-CS3 gene group, the transitions with the most genes were the CS5-CS1  
485 and CS4-CS5 transitions, which were enriched with similar functional categories of genes  
486 including those related to translation, particularly a number of ribosomal protein genes (Figure 4).  
487 Examination of the two bins adjacent to the TSS revealed that a number of these genes contained  
488 both transitions with the CS5-CS1 transition immediately upstream of the CS4-CS5 transition. Our  
489 bootstrapping results showed that these genes are not enriched among our DEGs. On the contrary,  
490 the CS4-CS5 subgroup are under-represented among down-regulated DEGs (Figure 6).  
491 Interestingly, a group of genes shown in a previous study (Secco et al., 2013) to be down-regulated  
492 after 21 days of Pi deficiency were enriched among our CS5-CS1/CS4-CS5 genes (Supplemental  
493 Figure S6). This might indicate that 24 hours of Pi deficiency is sufficient to observe chromatin  
494 dynamics at these genes without observing a corresponding, detectable decline in transcript  
495 abundance. We propose that the sequential CS5-CS1 and CS4-CS5 transitions observed at the TSS  
496 reflect genes under control conditions that contain low H2A.Z and high H3K4me3 in the -1  
497 nucleosome and high levels of both marks in the +1 nucleosome. Pi starvation, then, results in a  
498 moderate loss of nucleosome occupancy at both the +1 and -1 nucleosomes, and specific removal  
499 of H3K4me3 from the -1 nucleosome and H2A.Z from the +1 nucleosome. In yeast, Spp1  
500 promotes the H3K4 trimethylase activity of the Set1 complex (Morillon et al., 2005). As a result,  
501 deletion of Spp1 results in substantial loss of global H3K4me3 levels, but the remaining H3K4me3  
502 (approximately 20 %) is not evenly distributed among genes. Genes that retain the highest levels  
503 of H3K4me3 in *Δspp1* mutants are enriched in ribosomal protein genes and other translation-  
504 related genes, whereas genes exhibiting the most severe H3K4me3 depletion are enriched in stress-

505 related genes (Howe et al., 2014). Also, the Spp1-independent genes tend to be more highly  
506 expressed during control conditions, and repressed during environmental stress, whereas the Spp1-  
507 dependent genes generally exhibit low expression during control conditions and induced  
508 expression during stress. Finally, in response to diamide stress, many yeast ribosomal protein  
509 genes are down-regulated and exhibit a decrease in H3K4me3 (Weiner et al., 2015). Our data  
510 suggest that rice employs different mechanisms to modulate H3K4me3 levels at distinct gene  
511 groups, similar to yeast. This is consistent with our CS4-CS3 and CS5-CS1 gene groups  
512 undergoing decreases in H3K4me3 via different chromatin remodeling complexes. Future studies  
513 on the roles of H3K4me3 and H2A.Z, in conjunction with additional marks such as H3K27me3,  
514 in the Pi deficiency-dependent regulation of gene expression will provide valuable information on  
515 the chromatin dynamics that impact low-Pi adaptation mechanisms.

516

## 517 **Materials and methods:**

### 518 **Plant material and growth conditions**

519 Sterilization and pre-germination (1 day at 37 °C followed by 2 days at 28 °C) were carried  
520 out on rice cultivar Nipponbare (*Oryza sativa ssp. japonica*) seeds. Seeds were transferred to 12-  
521 h light/12-h dark, at 30 °C/22 °C condition to germinate for 14 days. Seedlings were grown  
522 hydroponically in modified Yoshida Rice culture media as described (Yoshida et al., 1971, Secco  
523 et al., 2013). The solution was replaced every 7 days. After 21 days, seedlings were used for a 24-  
524 hour Pi-deficiency treatment (modified Yoshida Rice solution without NaH<sub>2</sub>PO<sub>4</sub>).

### 525 **ChIP-seq**

526 Four grams of frozen shoot tissue from 24-hour Pi deficiency or control treatment was used  
527 to perform chromatin immunoprecipitation (ChIP) as previously described (Zahraeifard et al.,  
528 2018) using the antibody (Millipore; lot number 2648189) against H3K4me3 and input genomic  
529 DNA as a control. Three biological replicates were used for both input and antibody treatments.  
530 Purification of ChIP DNA was carried out with the Clean and Concentrator kit (Zymo Research).  
531 Libraries were constructed using 1:20 diluted adaptor from Kapa Biosystems Hyper Library  
532 Construction Kit and 10 cycles of DNA amplification. Libraries were quantitated (qPCR) and  
533 multiplexed, and single-end sequencing was completed with a HiSeq2500 (Illumina) using a HiSeq

534 SBS sequencing kit (version 4) for 101 cycles at the University of Illinois Roy J. Carver  
535 Biotechnology Center. Approximately 147 million ChIP-seq reads were quality-checked and  
536 cleaned using FastQC and Trimmomatic-0.33 (Andrews, 2010, Bolger et al., 2014). Using Bowtie,  
537 the reads were aligned to MSU Rice Genome Annotation Release 7.1 (MSU7.1) with one  
538 mismatch allowed to retain uniquely mapped reads. The SICER software package (Zang et al.,  
539 2009) was used to define the H3K4me3 enrichment regions with the following parameters ( $W =$   
540  $200$ ,  $G = 200$ ,  $FDR < 1.00E-02$ ). The input genomic DNA was used as a background control.  
541 Differential H3K4me3 enrichment peaks between control and Pi deficiency samples were  
542 determined using SICER-df.sh shell script ( $W = 200$ ,  $G = 200$ ,  $FDR < 1.00E-02$ ). We defined the  
543 existence of peaks with protein-coding genes (PCG) if 50 % of peaks overlapped with PCG  
544 (including 250 bp upstream and downstream) using BEDTools intersect (Quinlan and Hall, 2010).  
545 The genome-wide distribution pattern of H3K4me3 and the published profile of H2A.Z  
546 (Zahraeifard et al., 2018) were visualized using ngs.plot (Shen et al., 2014). K-means clustering  
547 within ngs.plot was used to find different patterns of H3K4me3. Gene ontology (GO) terms  
548 enriched among clusters were analyzed with BiNGO and visualized with Cytoscape (Maere,  
549 Heymans et al. 2005).

## 550 **RNA-seq analysis**

551 RNA-sequencing reads were generated previously (Zahraeifard et al., 2018). A minimum  
552 of 58 million high-quality RNA-seq reads (100-bp single end) per sample were mapped to the  
553 MSU Rice Genome Annotation Release 7.1 (MSU7.1) using Bowtie2 tools (Langmead and  
554 Salzberg, 2012). Fragments per kilobase of transcript per million mapped reads (FPKM) were  
555 calculated with the Cuffdiff tool (Trapnell et al., 2012). DESeq2 was applied to identify  
556 differently-expressed genes (DEGs) (Love et al., 2014). The cutoff (adjusted P-value  $< 0.001$ )  
557 recommended for a small-sample RNA-seq experiment was used (Soneson and Delorenzi, 2013).  
558 Gene ontology (GO) terms enriched among DEGs were analyzed with BiNGO and visualized with  
559 Cytoscape (Maere et al., 2005).

## 560 **Chromatin States Analysis**

561 We used ChromHMM (Ernst and Kellis, 2012) with default parameters to characterize the  
562 chromatin state maps for control and Pi deficiency samples. We used the published profiles of  
563 H2A.Z ChIP-seq (Zahraeifard et al., 2018) and nucleosome occupancy (Zhang et al., 2018)

564 (MNase-seq), as well as the H3K4me3 profile generated in this study. All input data were binarized  
565 with BinarizedBam, included in ChromHMM (Ernst and Kellis, 2012) , and input genomic DNA  
566 was used to adjust binarization thresholds locally. The common model of chromatin states in both  
567 control and Pi-deficiency samples was developed by concatenating the marks using a hidden  
568 Markov model. Five chromatin states were generated based on the learned model parameters as  
569 described in ChromHMM (Ernst and Kellis, 2012). Chromatin state changes were analyzed using  
570 a previously described method (Fiziev et al., 2017). Briefly, the control and -Pi genomes were  
571 divided into 200-bp bins, each occupied by one chromatin state, and the chromatin state  
572 annotations of control and Pi-deficiency genomes were overlapped. The number of bins in each  
573 possible chromatin state were counted and called as the observed number. The expected number  
574 was calculated by multiplying the number of bins in the two chromatin states involved in each  
575 transition (a change in transition from control to Pi deficiency sample) and divided by total bins in  
576 the genome to calculate enrichment scores. Similarity between each pair of chromatin states was  
577 controlled by dividing the enrichment scores of each state transition to the enrichment scores of  
578 the reverse state transition. The distribution of chromatin states were identified using CEAS  
579 software (Shin et al., 2009). Each protein coding gene was assigned to one chromatin state based  
580 on the state of the 200-bp bin encompassing the transcription start site. For bootstrapping analysis,  
581 we used a custom FORTRAN script (Zahraeifard et al., 2018) to obtain the same number of  
582 randomly selected genes and estimate the percentage of overlap between these genes and each  
583 group of state transitions (1000 iterations). Binomial distribution tests were carried out with R  
584 (`pbinom`,  $P\text{-value} < 1.00E-03$ ). For the chromatin state transition plot (Figure 4), chromatin states  
585 in control samples were differentially color-coded. Genes in each control chromatin state were  
586 sorted based on their positions within each chromosome. Chromatin transitions for each gene were  
587 connected with lines of colors matching those used for control chromatin states. Genes in each  
588 chromatin transition were positioned according to their expression changes upon Pi deficiency  
589 treatment, with up-regulated genes on the top and down-regulated on the bottom. These transition  
590 connections were plotted with `ggplot2` (Wickham, 2016). For the circos plot (Figure 3), each rice  
591 chromosome was partitioned into bins of 5kbp. Chromatin states were merged from 200bp bins to  
592 5kbp bins in both control and Pi deficiency samples. The most dominant chromatin state in each  
593 merged bin, or the chromatin state of the previous bin if most dominant chromatin state cannot be  
594 determined, was selected as the chromatin state for that bin. For gene type partition, the most

595 dominant gene type, in base pair, was used as the bin type for each bin. Chromatin states,  
596 differential expression status, bin types for the merged bins were determined using customized  
597 scripts and visualized with an R package circlize (Gu et al., 2014).

598

## 599 **Supplemental Material**

600 **Supplemental Figure S1.** H3K4me3 abundance is strongly correlated with gene length but varies  
601 in abundance at the transcription start site (TSS). H3K4me3 heat map (A) and average plot (B)  
602 based on the gene length in gene body of protein-coding genes (PCG) from 500 bp upstream of  
603 the transcription start site (TSS) to 500 bp downstream of the transcription termination site (TES).  
604 Five quintiles were ordered by gene length (Q1-Q5). Average plot (C) and heat map (D) of k-  
605 means H3K4me3 clusters around the TSS (50 bp upstream and downstream of the TSS). Control  
606 input reads were used for ChIP-Seq read normalization.

607

608 **Supplemental Figure S2.** Difference of H3K4me3 enrichment pattern across rice protein coding  
609 genes (PCG) under 24-hours of Pi deficiency. Average plot of H3K4me3 for all PCG in control  
610 (Ctrl) or Pi deficiency (-Pi) samples.

611

612 **Supplemental Figure S3.** Log2 fold change of genomic bins occupied by each chromatin state in  
613 control (ctrl) compared to Pi deficiency (-Pi) samples.

614

615 **Supplemental Figure S4.** CS5-CS1 and CS4-CS5 transitions occur in sequence. Bootstrapping  
616 analysis showing the percentage of CS5-CS1 genes that exhibit a CS4-CS5 transition in the bin  
617 downstream (A) or upstream (C) of the TSS. Bootstrapping analysis showing the percentage of  
618 CS4-CS5 genes that exhibit a CS5-CS1 transition in the bin upstream (B) or downstream (D) of  
619 the TSS. All data are means ( $\pm$ SD) for 1000 iterations. Asterisks indicate significance at p-value  
620  $< 0.001$ .

621

622 **Supplemental Figure S5.** Identification of differentially expressed genes in response to 24 hours  
623 of Pi deficiency. (A) MA plots of RNA-seq data by DESeq2. Networks representing Gene  
624 Ontology (GO) terms in the Biological Process (B), cellular component (C) and molecular

625 functions (M) category enriched in DEGs that are down-regulated (B) and up-regulated (C) by  
626 Phosphate deficiency. Bingo and Cytoscape were used to identify and visualize enriched GO  
627 terms. Circle color shows p-value of enrichment.

628

629 **Supplemental Figure S6.** Bootstrapping analysis showing the overlap between genes exhibiting  
630 chromatin state transitions (CS5-CS1, CS4-CS5) and genes down-regulated in shoots following a  
631 21-day Pi deficiency treatment from a previous study (Secco et al., 2013). All data are means  
632 ( $\pm$ SD) for 1000 iterations. Asterisks indicate significance at p-value < 0.01.

633

634 **Supplemental Figure S7.** Gene Ontology (GO) terms enriched in differentially expressed genes  
635 (DEGs) that have a chromatin state (CS) transition of CS4-CS3. Bingo and Cytoscape were used  
636 to identify and visualize enriched GO terms. Circle color shows p-value of enrichment.

637

638 **Supplemental Table S1.** Summary of ChIP-seq and RNA-seq libraries (short reads). The number  
639 of total and uniquely mapped reads for shoots from 36-day-old rice seedlings under control  
640 conditions (Ctrl) or following a 24-hour P-deficiency treatment (-P). Each sample contains two  
641 replicates (rep).

642

643 **Supplemental Table S2.** Summary of gene ontology (GO) analysis of genes differentially  
644 expressed under P-deficiency.

645

646 **Supplementary Dataset 1.** Significantly enriched GO terms for four sub-groups of protein-coding  
647 genes displaying different H3K4me3 abundance levels at the TSS.

648

649 **Supplementary Dataset 2.** Significantly enriched GO terms for eight gene groups exhibiting  
650 specific chromatin transitions.

651

652 **Supplementary Dataset 3.** Differentially expressed genes showing a CS4-CS3 chromatin  
653 transition.

654

655



656 **Accession numbers**

657 H3K4me3 ChIP-seq and RNA-seq data sets from this article were submitted to the NCBI Sequence  
658 Read Archive (SRA) Database under the accession, SRP102668.

659

660 **Acknowledgements**

661 The authors thank High Performance Computing at Louisiana State University (HPC@LSU) for  
662 providing computer resources. We also thank Aliasghar Sepehri for sharing the custom FORTRAN  
663 script to perform bootstrapping analyses.

664

665 **Figure legends**

666 **Figure 1.** H3K4me3 abundance is predominantly associated with the transcription start site (TSS)  
667 and co-localizes with H2A.Z. Distribution of H3K4me3 (A) and H2A.Z (B) among four gene types  
668 in shoots from rice seedlings grown under control conditions. Control input reads were used for  
669 ChIP-Seq read normalization. PCG, protein coding genes; PG, pseudogenes; TE, non-expressed  
670 transposable element-related genes; TEG, expressed transposable element-related genes. (C)  
671 Scatter plot of read counts from H3K4me3 and H2A.Z samples (Pearson correlation = 0.77). (D)  
672 Venn diagram showing the number of H3K4me3- and H2A.Z-enrichment peaks and the overlap.

673

674 **Figure 2.** Correlations between H3K4me3 and H2A.Z distribution and gene expression in rice  
675 shoots. Heat map (A) and distribution of H3K4me3 (B) across the gene body in control samples  
676 for six gene groups ordered based on transcript abundance level (FPKM), defined as 1st (highest)  
677 to 5th (lowest) and no expression (zero). (C) Distribution of H3K4me3 and H2AZ across the gene  
678 body from 500 bp upstream of the TSS to 500 bp downstream of the TES. Control input reads  
679 were used for ChIP-Seq read normalization.

680

681 **Figure 3.** Chromatin state predictions for control (Ctrl) and Pi deficiency (-Pi) samples defined  
682 by H3K4me3, H2A.Z and nucleosome occupancy. (A) Emission parameters for 5 chromatin states  
683 (CS). The darker blue color corresponds to a greater probability of observing the mark in the state.

684 Overlap fold enrichment of various genomic regions with 5 chromatin states in Ctrl (B) and -Pi  
685 (C) samples. PCG, protein coding genes; PG, pseudogenes; TE, non-expressed transposable  
686 element-related genes; TEG, expressed transposable element-related genes; TSS, transcription  
687 start site; TES, transcription termination site; TSS1Kb, 200 bp upstream to 800 bp downstream of  
688 the TSS; TES1Kb, 800 bp upstream to 200 bp downstream of the TES. (D) Circos plot showing  
689 the chromatin states (in 5kbp bins) of the whole genome. The first and second rings show the  
690 chromatin state in -Pi and Ctrl condition respectively. The third ring shows fold change of  
691 differentially expressed genes and the last ring represents four gene types. Each segment in circos  
692 plot showed one chromosome (Chr) in the rice genome.

693

694 **Figure 4.** Chromatin state (CS) transitions of protein-coding genes from control (Ctrl) to Pi  
695 deficiency (-Pi) conditions. (Left) The size of the segment represents the number of gene in each  
696 CS and the width of the ribbons represent the number of genes with a transition to another CS.  
697 (Right) Networks representing Gene Ontology Markov Clustering (GOMCL) terms enriched in  
698 CS5-CS1, CS4-CS3 and CS4-CS5 groups. Cytoscape was used to visualize enriched GO terms.

699

700 **Figure 5.** Chromatin state (CS) transitions are associated with differentially-expressed genes  
701 (DEGs) under phosphate deficiency. (A) Bootstrapping analysis showing the overlap between  
702 genes exhibiting chromatin state transitions and down-regulated or up-regulated genes in response  
703 to Pi deficiency. Data are means ( $\pm$ SD) for 1000 iterations. (B) Values are the average probability  
704 of each chromatin mark at the CS shown. The category of DEG (up or down) that is biased to the  
705 CS is shown at right.

706

707 **Figure 6.** Predicted functions and subcellular locations of differentially-expressed genes (DEGs)  
708 having a chromatin state (CS) transition of CS4 to CS3.

709

710 **Figure 7.** Predicted interactions and functions of differentially-expressed genes having  
711 a chromatin state (CS) transition of CS4 to CS3. Abbreviations: 2OG, 2OG-Fe oxygenase; a/b  
712 bar, A/B barrel; a/b fold, alpha/beta fold hydrolase; ACO, 1-aminocyclopropane-1-carboxylate  
713 oxidase; a-glu, heparan-alpha-glucosaminide N-acetyltransferase; AGP, arabinogalactan protein;  
714 AIR, auxin response protein; AOS, allene oxide synthase; AP2; B-gal, beta-galactosidase; B-glu,

715 Beta glucan synthase; B-gluc, beta-glucuronidase; BTB, Bric-a-Brac, Tramtrack, Broad  
716 Complex protein; bZIP; Ca ATPase; CaM, Calmodulin-related calcium sensor; CHASE; CLP,  
717 ATP-dependent caseinolytic protease/crotonase; COBRA, AtCOBRA-like; E3 lig, ubiquitin  
718 ligase; EXP, expansin; FA, fatty acid hydroxylase; FER, AtFERONIA ortholog; FORK,  
719 FORKED1-like; G3P, glycerol-3-phosphate acyltransferase; GASR, GASA/GAST/Snakin;  
720 GDSL, GDSL-like lipase/acylhydrolase; GID, gibberellin receptor; GlyHy, glycosyl hydrolase;  
721 HAD, HAD phosphoethanolamine/phosphocholine phosphatase; HLH; HLH helix-loop-helix  
722 transcription factor; HSF, heat shock factor; HXXXD, HXXXD-type acyl-transferase; ILR, IAA-  
723 amino acid hydrolase; Integ, cell wall integrity protein; IQ CaM, IQ calmodulin-binding motif  
724 protein; JAZ, ZIM domain-containing JAZ protein; kCoA, 3-ketoacyl-CoA synthase; kinase;  
725 KNOT, knotted-1-like homeobox protein; LIG, lignin dirigent; lipase; LRX, leucine-rich repeat  
726 extensin; LTPL, Protease inhibitor/seed storage/LTP protein; LYM, lysM domain-containing  
727 GPI-anchored protein; MEE, maternal effect embryo arrest; MYB; N-Gly, shiga/ricin-like N-  
728 glycosidase; NPC, non-specific phospholipase; OXI, oxidoreductase; P450, cytochrome P450;  
729 PDD, PD-(D/E)XK nuclease superfamily protein; PEC, pectinase; PLA, phospholipase A;  
730 PLATZ; PNM, phosphoethanolamine N-methyltransferase; POX, peroxidase; PPR,  
731 pentatricopeptide repeat protein; RALF, Rapid ALkalinization Factor ; RLK, receptor-like  
732 kinase; S1P, Subtilisin Site-1 Protease; SAM, S-adenosyl-L-methionine-dependent  
733 methyltransferases; SRO, OsSRO1c; SULF, sulfotransferase; UDP, UDP-glucuronosyl/UDP-  
734 glucosyltransferase; UVB, ultraviolet-B-repressible protein; VQ, VQ domain containing protein;  
735 WAK, wall-associated kinase; WAX, WAX2-like; WRKY; ZGT, ZGT circadian clock coupling  
736 factor; ZR1, FYVE zinc finger domain protein.

737

## 738 Literature Cited

- 739 Andrews, S. 2010. FastQC: a quality control tool for high throughput sequence data.  
740 Barski, A., Cuddapah, S., Cui, K., Roh, T.-Y., Schones, D. E., Wang, Z., Wei, G., Chepelev, I. &  
741 Zhao, K. 2007. High-resolution profiling of histone methylations in the human genome.  
742 *Cell*, 129, 823-837.
- 743 Bernstein, B. E., Humphrey, E. L., Erlich, R. L., Schneider, R., Bouman, P., Liu, J. S.,  
744 Kouzarides, T. & Schreiber, S. L. 2002. Methylation of histone H3 Lys 4 in coding  
745 regions of active genes. *Proceedings of the National Academy of Sciences*, 99, 8695-  
746 8700.
- 747 Bernstein, B. E., Mikkelsen, T. S., Xie, X., Kamal, M., Huebert, D. J., Cuff, J., Fry, B., Meissner,  
748 A., Wernig, M. & Plath, K. 2006. A bivalent chromatin structure marks key  
749 developmental genes in embryonic stem cells. *Cell*, 125, 315-326.
- 750 Berriri, S., Gangappa, S. N. & Kumar, S. V. 2016. SWR1 chromatin-remodeling complex  
751 subunits and H2A. Z have non-overlapping functions in immunity and gene regulation in  
752 *Arabidopsis*. *Molecular plant*, 9, 1051-1065.
- 753 Bolger, A. M., Lohse, M. & Usadel, B. 2014. Trimmomatic: a flexible trimmer for Illumina  
754 sequence data. *Bioinformatics*, 30, 2114-2120.
- 755 Cai, H., Xie, W. & Lian, X. 2013. Comparative analysis of differentially expressed genes in rice  
756 under nitrogen and phosphorus starvation stress conditions. *Plant molecular biology  
757 reporter*, 31, 160-173.
- 758 Cai, H., Zhang, M., Chai, M., He, Q., Huang, X., Zhao, L. & Qin, Y. 2019. Epigenetic regulation  
759 of anthocyanin biosynthesis by an antagonistic interaction between H2A. Z and  
760 H3K4me3. *New Phytologist*, 221, 295-308.
- 761 Campbell, L. & Turner, S. R. 2017. A comprehensive analysis of RALF proteins in green plants  
762 suggests there are two distinct functional groups. *Frontiers in plant science*, 8, 37.
- 763 Cano-Rodriguez, D., Gjaltema, R. a. F., Jilderda, L. J., Jellema, P., Dokter-Fokkens, J., Ruiters,  
764 M. H. J. & Rots, M. G. 2016. Writing of H3K4Me3 overcomes epigenetic silencing in a  
765 sustained but context-dependent manner. *Nature communications*, 7, 12284.
- 766 Carter, B., Bishop, B., Ho, K. K., Huang, R., Jia, W., Zhang, H., Pascuzzi, P. E., Deal, R. B. &  
767 Ogas, J. 2018. The chromatin remodelers PKL and PIE1 act in an epigenetic pathway that  
768 determines H3K27me3 homeostasis in *Arabidopsis*. *The Plant Cell*, 30, 1337-1352.
- 769 Chandrika, N. N. P., Sundaravelpandian, K., Yu, S. M. & Schmidt, W. 2013. ALFIN-LIKE 6 is  
770 involved in root hair elongation during phosphate deficiency in *Arabidopsis*. *New  
771 Phytologist*, 198, 709-720.
- 772 Chen, C.-Y., Wu, K. & Schmidt, W. 2015. The histone deacetylase HDA19 controls root cell  
773 elongation and modulates a subset of phosphate starvation responses in *Arabidopsis*.  
774 *Scientific reports*, 5, 15708.
- 775 Chen, L.-Q., Luo, J.-H., Cui, Z.-H., Xue, M., Wang, L., Zhang, X.-Y., Pawlowski, W. P. & He,  
776 Y. 2017. ATX3, ATX4, and ATX5 encode putative H3K4 methyltransferases and are  
777 critical for plant development. *Plant physiology*, 174, 1795-1806.
- 778 Clouaire, T., Webb, S., Skene, P., Illingworth, R., Kerr, A., Andrews, R., Lee, J.-H., Skalnik, D.  
779 & Bird, A. 2012. Cfp1 integrates both CpG content and gene activity for accurate  
780 H3K4me3 deposition in embryonic stem cells. *Genes & development*, 26, 1714-1728.
- 781 Coleman-Derr, D. & Zilberman, D. 2012. Deposition of histone variant H2A. Z within gene  
782 bodies regulates responsive genes. *PLoS genetics*, 8, e1002988.

- 783 Cui, P., Liu, W., Zhao, Y., Lin, Q., Ding, F., Xin, C., Geng, J., Song, S., Sun, F. & Hu, S. 2012.  
784 The association between H3K4me3 and antisense transcription. *Genomics, proteomics &*  
785 *bioinformatics*, 10, 74-81.
- 786 Dai, X., Bai, Y., Zhao, L., Dou, X., Liu, Y., Wang, L., Li, Y., Li, W., Hui, Y. & Huang, X. 2017.  
787 H2A. Z represses gene expression by modulating promoter nucleosome structure and  
788 enhancer histone modifications in Arabidopsis. *Molecular plant*, 10, 1274-1292.
- 789 Deal, R. B., Topp, C. N., Mckinney, E. C. & Meagher, R. B. 2007. Repression of flowering in  
790 Arabidopsis requires activation of FLOWERING LOCUS C expression by the histone  
791 variant H2A. Z. *The Plant Cell*, 19, 74-83.
- 792 Ding, Y., Avramova, Z. & Fromm, M. 2011. The Arabidopsis trithorax-like factor ATX1  
793 functions in dehydration stress responses via ABA-dependent and ABA-independent  
794 pathways. *The Plant Journal*, 66, 735-744.
- 795 Ding, Y., Fromm, M. & Avramova, Z. 2012. Multiple exposures to drought'train'transcriptional  
796 responses in Arabidopsis. *Nature Communications*, 3, 740.
- 797 Du, Z., Li, H., Wei, Q., Zhao, X., Wang, C., Zhu, Q., Yi, X., Xu, W., Liu, X. S. & Jin, W. 2013.  
798 Genome-wide analysis of histone modifications: H3K4me2, H3K4me3, H3K9ac, and  
799 H3K27ac in *Oryza sativa* L. Japonica. *Molecular plant*, 6, 1463-1472.
- 800 Ernst, J. & Kellis, M. 2012. ChromHMM: automating chromatin-state discovery and  
801 characterization. *Nature methods*, 9, 215.
- 802 Feng, W., Kita, D., Peaucelle, A., Cartwright, H. N., Doan, V., Duan, Q., Liu, M.-C., Maman, J.,  
803 Steinhorst, L. & Schmitz-Thom, I. 2018. The FERONIA receptor kinase maintains cell-  
804 wall integrity during salt stress through Ca<sup>2+</sup> signaling. *Current Biology*, 28, 666-675.  
805 e5.
- 806 Fiziev, P., Akdemir, K. C., Miller, J. P., Keung, E. Z., Samant, N. S., Sharma, S., Natale, C. A.,  
807 Terranova, C. J., Maitituoheti, M. & Amin, S. B. 2017. Systematic epigenomic analysis  
808 reveals chromatin states associated with melanoma progression. *Cell reports*, 19, 875-  
809 889.
- 810 Guo, L., Yu, Y., Law, J. A. & Zhang, X. 2010. SET DOMAIN GROUP2 is the major histone H3  
811 lysine 4 trimethyltransferase in Arabidopsis. *Proceedings of the National Academy of*  
812 *Sciences*, 201010478.
- 813 Holford, I. 1997. Soil phosphorus: its measurement, and its uptake by plants. *Soil Research*, 35,  
814 227-240.
- 815 Howe, F. S., Boubriak, I., Sale, M. J., Nair, A., Clynes, D., Grijzenhout, A., Murray, S. C.,  
816 Woloszczuk, R. & Mellor, J. 2014. Lysine acetylation controls local protein conformation  
817 by influencing proline isomerization. *Molecular cell*, 55, 733-744.
- 818 Howe, F. S., Fischl, H., Murray, S. C. & Mellor, J. 2017. Is H3K4me3 instructive for  
819 transcription activation? *Bioessays*, 39, 1-12.
- 820 Hruz, T., Laule, O., Szabo, G., Wessendorp, F., Bleuler, S., Oertle, L., Widmayer, P., Gruissem,  
821 W., and Zimmermann, P. 2008. Genevestigator V3: a reference expression database for  
822 the meta-analysis of transcriptomes. *Advances in Bioinformatics*, 420747.
- 823 Jaskiewicz, M., Conrath, U. & Peterhänsel, C. 2011. Chromatin modification acts as a memory  
824 for systemic acquired resistance in the plant stress response. *EMBO reports*, 12, 50-55.
- 825 Kawahara, Y., De La Bastide, M., Hamilton, J. P., Kanamori, H., McCombie, W. R., Ouyang, S.,  
826 Schwartz, D. C., Tanaka, T., Wu, J. & Zhou, S. 2013. Improvement of the *Oryza sativa*  
827 Nipponbare reference genome using next generation sequence and optical map data. *Rice*,  
828 6, 4.



- 829 Kim, J.-M., To, T. K., Ishida, J., Morosawa, T., Kawashima, M., Matsui, A., Toyoda, T.,  
830 Kimura, H., Shinozaki, K. & Seki, M. 2008. Alterations of lysine modifications on the  
831 histone H3 N-tail under drought stress conditions in *Arabidopsis thaliana*. *Plant and Cell*  
832 *Physiology*, 49, 1580-1588.
- 833 Kumar, S. V. & Wigge, P. A. 2010. H2A. Z-containing nucleosomes mediate the thermosensory  
834 response in *Arabidopsis*. *Cell*, 140, 136-147.
- 835 Langmead, B. & Salzberg, S. L. 2012. Fast gapped-read alignment with Bowtie 2. *Nature*  
836 *methods*, 9, 357.
- 837 Liao, H., Tang, R., Zhang, X., Luan, S. & Yu, F. 2017. FERONIA receptor kinase at the  
838 crossroads of hormone signaling and stress responses. *Plant and Cell Physiology*, 58,  
839 1143-1150.
- 840 Lin, W.-D., Liao, Y.-Y., Yang, T. J., Pan, C.-Y., Buckhout, T. J. & Schmidt, W. 2011.  
841 Coexpression-based clustering of *Arabidopsis* root genes predicts functional modules in  
842 early phosphate deficiency signaling. *Plant physiology*, 155, 1383-1402.
- 843 Liu, C. L., Kaplan, T., Kim, M., Buratowski, S., Schreiber, S. L., Friedman, N. & Rando, O. J.  
844 2005. Single-nucleosome mapping of histone modifications in *S. cerevisiae*. *PLoS*  
845 *biology*, 3, e328.
- 846 Love, M. I., Huber, W. & Anders, S. 2014. Moderated estimation of fold change and dispersion  
847 for RNA-seq data with DESeq2. *Genome biology*, 15, 550.
- 848 Luger, K., Mäder, A. W., Richmond, R. K., Sargent, D. F. & Richmond, T. J. 1997. Crystal  
849 structure of the nucleosome core particle at 2.8 Å resolution. *Nature*, 389, 251.
- 850 Maere, S., Heymans, K. & Kuiper, M. 2005. BiNGO: a Cytoscape plugin to assess  
851 overrepresentation of gene ontology categories in biological networks. *Bioinformatics*,  
852 21, 3448-3449.
- 853 March-Díaz, R. & Reyes, J. C. 2009. The beauty of being a variant: H2A. Z and the SWR1  
854 complex in plants. *Molecular plant*, 2, 565-577.
- 855 Margaritis, T., Oreal, V., Brabers, N., Maestroni, L., Vitaliano-Prunier, A., Benschop, J. J., Van  
856 Hooff, S., Van Leenen, D., Dargemont, C. & Geli, V. 2012. Two distinct repressive  
857 mechanisms for histone 3 lysine 4 methylation through promoting 3'-end antisense  
858 transcription. *PLoS genetics*, 8, e1002952.
- 859 Mariño-Ramírez, L., Kann, M. G., Shoemaker, B. A. & Landsman, D. 2005. Histone structure  
860 and nucleosome stability. *Expert review of proteomics*, 2, 719-729.
- 861 Morillon, A., Karabetsov, N., Nair, A. & Mellor, J. 2005. Dynamic lysine methylation on histone  
862 H3 defines the regulatory phase of gene transcription. *Molecular cell*, 18, 723-734.
- 863 Pan, X., Fang, Y., Yang, X., Zheng, D., Chen, L., Wang, L., Xiao, J., Wang, X.-E., Wang, K. &  
864 Cheng, Z. 2017. Chromatin states responsible for the regulation of differentially  
865 expressed genes under 60 Co- $\gamma$  ray radiation in rice. *BMC genomics*, 18, 778.
- 866 Ponting, C. P., Oliver, P. L. & Reik, W. 2009. Evolution and functions of long noncoding RNAs.  
867 *Cell*, 136, 629-641.
- 868 Quinlan, A. R. & Hall, I. M. 2010. BEDTools: a flexible suite of utilities for comparing genomic  
869 features. *Bioinformatics*, 26, 841-842.
- 870 Ramírez, F., Ryan, D. P., Grüning, B., Bhardwaj, V., Kilpert, F., Richter, A. S., Heyne, S.,  
871 Dündar, F. & Manke, T. 2016. deepTools2: a next generation web server for deep-  
872 sequencing data analysis. *Nucleic acids research*, 44, W160-W165.

- 873 Santos-Rosa, H., Schneider, R., Bannister, A. J., Sherriff, J., Bernstein, B. E., Emre, N. T.,  
874 Schreiber, S. L., Mellor, J. & Kouzarides, T. 2002. Active genes are tri-methylated at K4  
875 of histone H3. *Nature*, 419, 407.
- 876 Secco, D., Jabnour, M., Walker, H., Shou, H., Wu, P., Poirier, Y. & Whelan, J. 2013. Spatio-  
877 temporal transcript profiling of rice roots and shoots in response to phosphate starvation  
878 and recovery. *The Plant Cell*, 25, 4285-4304.
- 879 Shen, L., Shao, N., Liu, X. & Nestler, E. 2014. ngs. plot: Quick mining and visualization of next-  
880 generation sequencing data by integrating genomic databases. *BMC genomics*, 15, 284.
- 881 Shin, H., Liu, T., Manrai, A. K. & Liu, X. S. 2009. CEAS: cis-regulatory element annotation  
882 system. *Bioinformatics*, 25, 2605-2606.
- 883 Smith, A. P., Jain, A., Deal, R. B., Nagarajan, V. K., Poling, M. D., Raghothama, K. G. &  
884 Meagher, R. B. 2010. Histone H2A. Z regulates the expression of several classes of  
885 phosphate starvation response genes but not as a transcriptional activator. *Plant*  
886 *Physiology*, 152, 217-225.
- 887 Sokol, A., Kwiatkowska, A., Jerzmanowski, A. & Prymakowska-Bosak, M. 2007. Up-regulation  
888 of stress-inducible genes in tobacco and Arabidopsis cells in response to abiotic stresses  
889 and ABA treatment correlates with dynamic changes in histone H3 and H4 modifications.  
890 *Planta*, 227, 245-254.
- 891 Sonesson, C. & Delorenzi, M. 2013. A comparison of methods for differential expression analysis  
892 of RNA-seq data. *BMC bioinformatics*, 14, 91.
- 893 Stegmann, M., Monaghan, J., Smakowska-Luzan, E., Rovenich, H., Lehner, A., Holton, N.,  
894 Belkhadir, Y. & Zipfel, C. 2017. The receptor kinase FER is a RALF-regulated scaffold  
895 controlling plant immune signaling. *Science*, 355, 287-289.
- 896 Sun, L., Song, L., Zhang, Y., Zheng, Z. & Liu, D. 2016. Arabidopsis PHL2 and PHR1 act  
897 redundantly as the key components of the central regulatory system controlling  
898 transcriptional responses to phosphate starvation. *Plant Physiology*, 170, 499-514.
- 899 Sura, W., Kabza, M., Karlowski, W. M., Bieluszewski, T., Kus-Slowinska, M., Pawłowski, Ł.,  
900 Sadowski, J. & Ziolkowski, P. A. 2017. Dual role of the histone variant H2A. Z in  
901 transcriptional regulation of stress-response genes. *The Plant Cell*, 29, 791-807.
- 902 Thibaud, M. C., Arrighi, J. F., Bayle, V., Chiarenza, S., Creff, A., Bustos, R., Paz-Ares, J.,  
903 Poirier, Y. & Nussaume, L. 2010. Dissection of local and systemic transcriptional  
904 responses to phosphate starvation in Arabidopsis. *The Plant Journal*, 64, 775-789.
- 905 Trapnell, C., Roberts, A., Goff, L., Pertea, G., Kim, D., Kelley, D. R., Pimentel, H., Salzberg, S.  
906 L., Rinn, J. L. & Pachter, L. 2012. Differential gene and transcript expression analysis of  
907 RNA-seq experiments with TopHat and Cufflinks. *Nature protocols*, 7, 562.
- 908 Tsuji, H., Saika, H., Tsutsumi, N., Hirai, A. & Nakazono, M. 2006. Dynamic and reversible  
909 changes in histone H3-Lys4 methylation and H3 acetylation occurring at submergence-  
910 inducible genes in rice. *Plant and cell physiology*, 47, 995-1003.
- 911 Van Dijk, K., Ding, Y., Malkaram, S., Riethoven, J.-J. M., Liu, R., Yang, J., Laczko, P., Chen,  
912 H., Xia, Y. & Ladunga, I. 2010. Dynamic changes in genome-wide histone H3 lysine 4  
913 methylation patterns in response to dehydration stress in Arabidopsis thaliana. *BMC plant*  
914 *biology*, 10, 238.
- 915 Vance, C. P., Uhde-Stone, C. & Allan, D. L. 2003. Phosphorus acquisition and use: critical  
916 adaptations by plants for securing a nonrenewable resource. *New phytologist*, 157, 423-  
917 447.



- 918 Venkatesh, S. & Workman, J. L. 2015. Histone exchange, chromatin structure and the regulation  
919 of transcription. *Nature reviews Molecular cell biology*, 16, 178.
- 920 Voxeur, A., Höfte, H. 2016. Cell wall integrity signaling in plants: “To grow or not to grow that's  
921 the question.” *Glycobiology*, 26, 950–960.
- 922 Weiner, A., Hsieh, T.-H. S., Appleboim, A.,  
923 Chen, H. V., Rahat, A., Amit, I., Rando, O. J. & Friedman, N. 2015. High-resolution  
924 chromatin dynamics during a yeast stress response. *Molecular cell*, 58, 371-386.
- 925 Wang, G., Oh, D.-H., and Dassanayake, M. GOMCL: a tool to cluster Gene Ontology based  
926 functions. *Bioinformatics*, in review.
- 927 Xu, M., Leichty, A. R., Hu, T. & Poethig, R. S. 2018. H2A. Z promotes the transcription of  
928 MIR156A and MIR156C in Arabidopsis by facilitating the deposition of H3K4me3.  
929 *Development*, 145, dev152868.
- 930 Yan, H., Liu, Y., Zhang, K., Xu, W. & Su, Z. 2019. Chromatin state-based analysis of epigenetic  
931 H3K4me3 marks of Arabidopsis in response to dark stress. *Frontiers in Genetics*, 10,  
932 306.
- 933 Yelagandula, R., Stroud, H., Holec, S., Zhou, K., Feng, S., Zhong, X., Muthurajan, U. M., Nie,  
934 X., Kawashima, T. & Groth, M. 2014. The histone variant H2A. W defines  
935 heterochromatin and promotes chromatin condensation in Arabidopsis. *Cell*, 158, 98-109.
- 936 Yoshida, S., Forno, D. A. & Cock, J. H. 1971. Laboratory manual for physiological studies of  
937 rice. *Laboratory manual for physiological studies of rice*.
- 938 You, Q., Yi, X., Zhang, K., Wang, C., Ma, X., Zhang, X., Xu, W., Li, F. & Su, Z. 2017.  
939 Genome-wide comparative analysis of H3K4me3 profiles between diploid and  
940 allotetraploid cotton to refine genome annotation. *Scientific reports*, 7, 9098.
- 941 Zahraeifard, S., Foroozani, M., Sepehri, A., Oh, D.-H., Wang, G., Mangu, V., Chen, B., Baisakh,  
942 N., Dassanayake, M. & Smith, A. P. 2018. Rice H2A. Z negatively Regulates Genes  
943 Responsive to Nutrient Starvation but Promotes Expression of Key Housekeeping Genes.  
944 *Journal of experimental botany*.
- 945 Zang, C., Schones, D. E., Zeng, C., Cui, K., Zhao, K. & Peng, W. 2009. A clustering approach  
946 for identification of enriched domains from histone modification ChIP-Seq data.  
947 *Bioinformatics*, 25, 1952-1958.
- 948 Zeng, Z., Zhang, W., Marand, A. P., Zhu, B., Buell, C. R. & Jiang, J. 2019. Cold stress induces  
949 enhanced chromatin accessibility and bivalent histone modifications H3K4me3 and  
950 H3K27me3 of active genes in potato. *Genome biology*, 20, 123.
- 951 Zhang, K., Xu, W., Wang, C., Yi, X., Zhang, W. & Su, Z. 2017. Differential deposition of H2A.  
952 Z in combination with histone modifications within related genes in *Oryza sativa* callus  
953 and seedling. *The Plant Journal*, 89, 264-277.
- 954 Zhang, Q., Oh, D.-H., Ditusa, S. F., Ramanarao, M. V., Baisakh, N., Dassanayake, M. & Smith,  
955 A. P. 2018. Rice nucleosome patterns undergo remodeling coincident with stress-induced  
956 gene expression. *BMC genomics*, 19, 97.
- 957 Zhang, X., Bernatavichute, Y. V., Cokus, S., Pellegrini, M. & Jacobsen, S. E. 2009. Genome-  
958 wide analysis of mono-, di- and trimethylation of histone H3 lysine 4 in Arabidopsis  
959 thaliana. *Genome biology*, 10, R62.
- 960 Zhao, C., Zayed, O., Yu, Z., Jiang, W., Zhu, P., Hsu, C.-C., Zhang, L., Tao, W. A., Lozano-  
961 Durán, R. & Zhu, J.-K. 2018. Leucine-rich repeat extensin proteins regulate plant salt  
962 tolerance in Arabidopsis. *Proceedings of the National Academy of Sciences*, 115, 13123-  
13128.

- 963 Zheng, D., Wang, L., Chen, L., Pan, X., Lin, K., Fang, Y., Wang, X.-E. & Zhang, W. 2019. Salt-  
964 Responsive Genes are Differentially Regulated at the Chromatin Levels Between  
965 Seedlings and Roots in Rice. *Plant and Cell Physiology*.
- 966 Zhou, L.-J., Xiao, L.-T. & Xue, H.-W. 2017. Dynamic cytology and transcriptional regulation of  
967 rice lamina joint development. *Plant Physiology*, 174, 1728-1746.
- 968 Zilberman, D., Coleman-Derr, D., Ballinger, T. & Henikoff, S. 2008. Histone H2A. Z and DNA  
969 methylation are mutually antagonistic chromatin marks. *Nature*, 456, 125.
- 970 Zong, W., Zhong, X., You, J. & Xiong, L. 2013. Genome-wide profiling of histone H3K4-tri-  
971 methylation and gene expression in rice under drought stress. *Plant Molecular Biology*,  
972 81, 175-188.
- 973
- 974

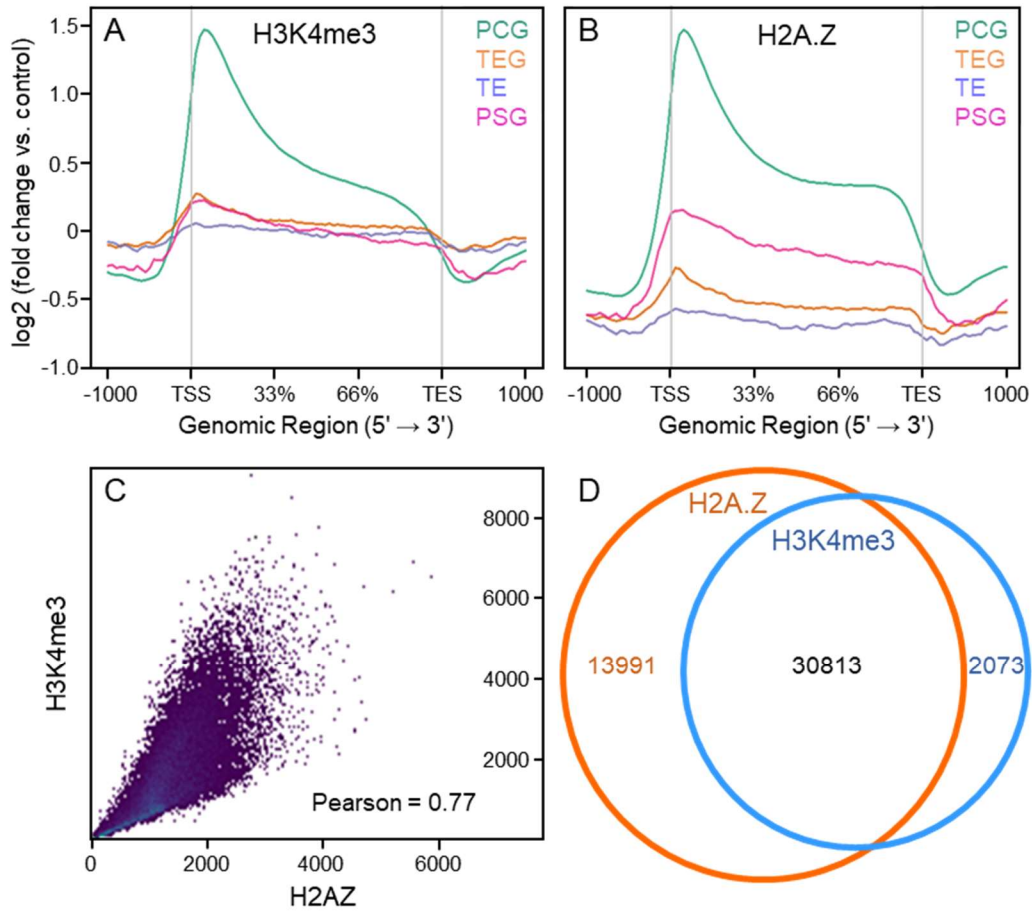

Figure 1. H3K4me3 abundance is predominantly associated with the transcription start site (TSS) and co-localizes with H2A.Z. Distribution of H3K4me3 (A) and H2A.Z (B) among four gene types in shoots from rice seedlings grown under control conditions. Control input reads were used for ChIP-Seq read normalization. PCG, protein coding genes; PG, pseudogenes; TE, non-expressed transposable element-related genes; TEG, expressed transposable element-related genes. (C) Scatter plot of read counts from H3K4me3 and H2A.Z samples (Pearson correlation = 0.77). (D) Venn diagram showing the number of H3K4me3- and H2A.Z-enrichment peaks and the overlap.

975

976

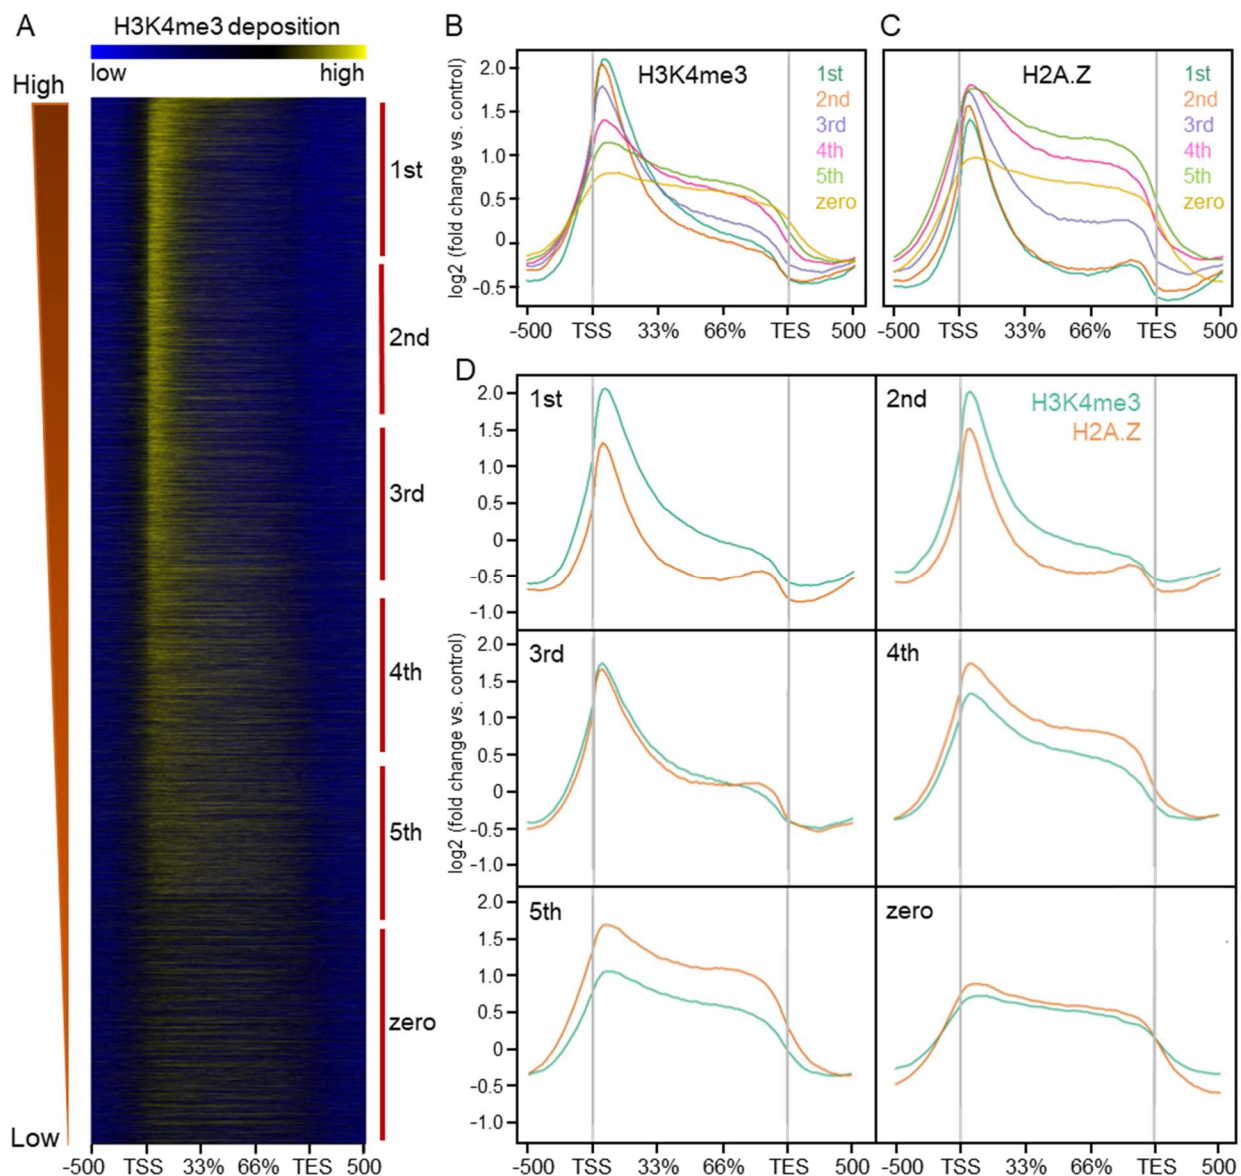

Figure 2. Correlations between H3K4me3 and H2A.Z distribution and gene expression in rice shoots. Heat map (A) and distribution of H3K4me3 (B) across the gene body in control samples for six gene groups ordered based on transcript abundance level (FPKM), defined as 1<sup>st</sup> (highest) to 5<sup>th</sup> (lowest) and no expression (zero). (C) Distribution of H3K4me3 and H2AZ across the gene body from 500 bp upstream of the TSS to 500 bp downstream of the TES. Control input reads were used for ChIP-Seq read normalization.

977

978

979



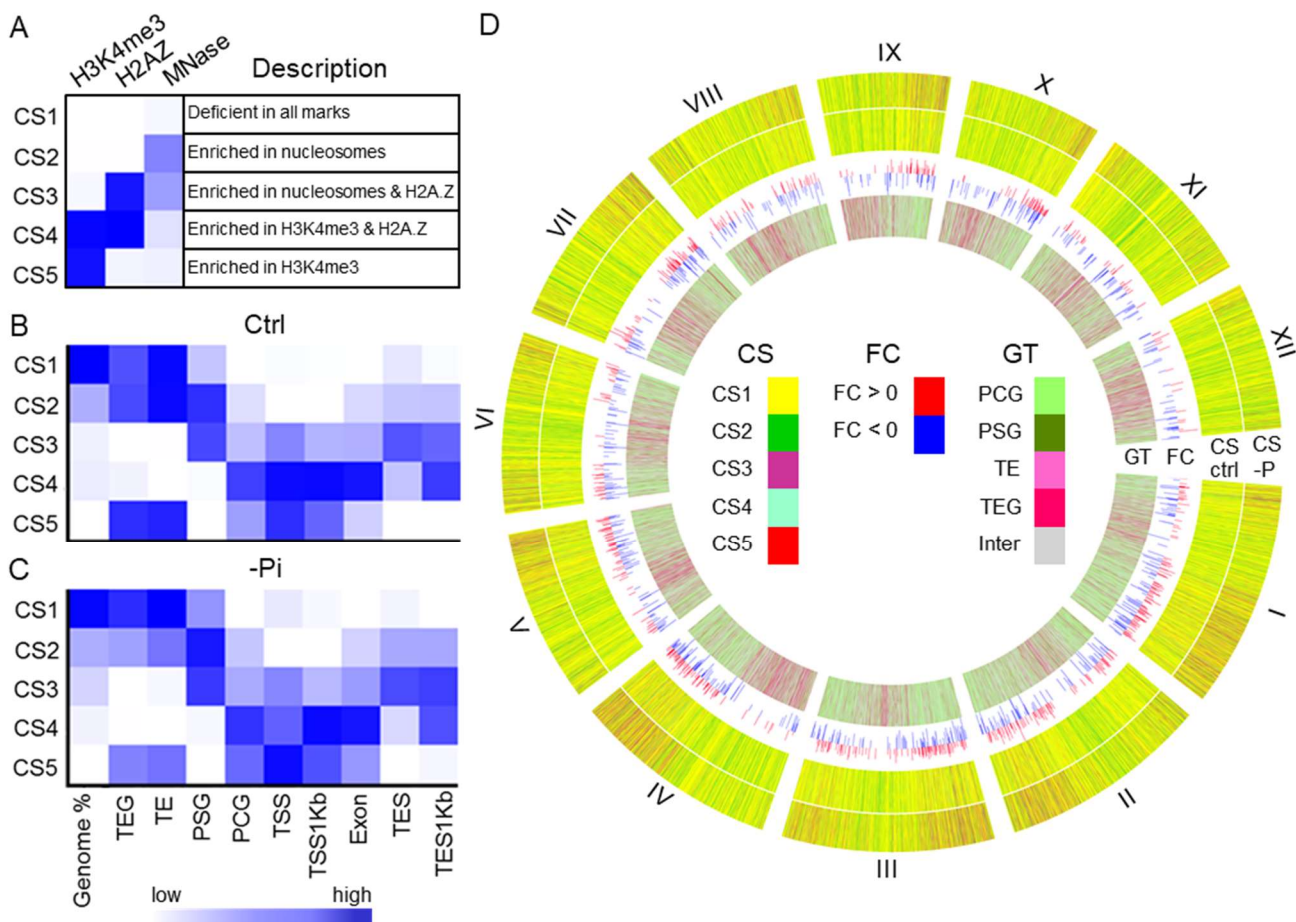

Figure 3. Chromatin state predictions for control (Ctrl) and Pi deficiency (-Pi) samples defined by H3K4me3, H2A.Z and nucleosome occupancy. (A) Emission parameters for 5 chromatin states (CS). The darker blue color corresponds to a greater probability of observing the mark in the state. Overlap fold enrichment of various genomic regions with 5 chromatin states in Ctrl (B) and -Pi (C) samples. PCG, protein coding genes; PG, pseudogenes; TE, non-expressed transposable element-related genes; TEG, expressed transposable element-related genes; TSS, transcription start site; TES, transcription termination site; TSS1Kb, 200 bp upstream to 800 bp downstream of the TSS; TES1Kb, 800 bp upstream to 200 bp downstream of the TES. (D) Circos plot showing the chromatin states (in 5kbp bins) of the whole genome. The first and second rings show the chromatin state in -Pi and Ctrl condition respectively. The third ring shows fold change of differentially expressed genes and the last ring represents four gene types. Roman numerals represent chromosome numbers.

980

981

982

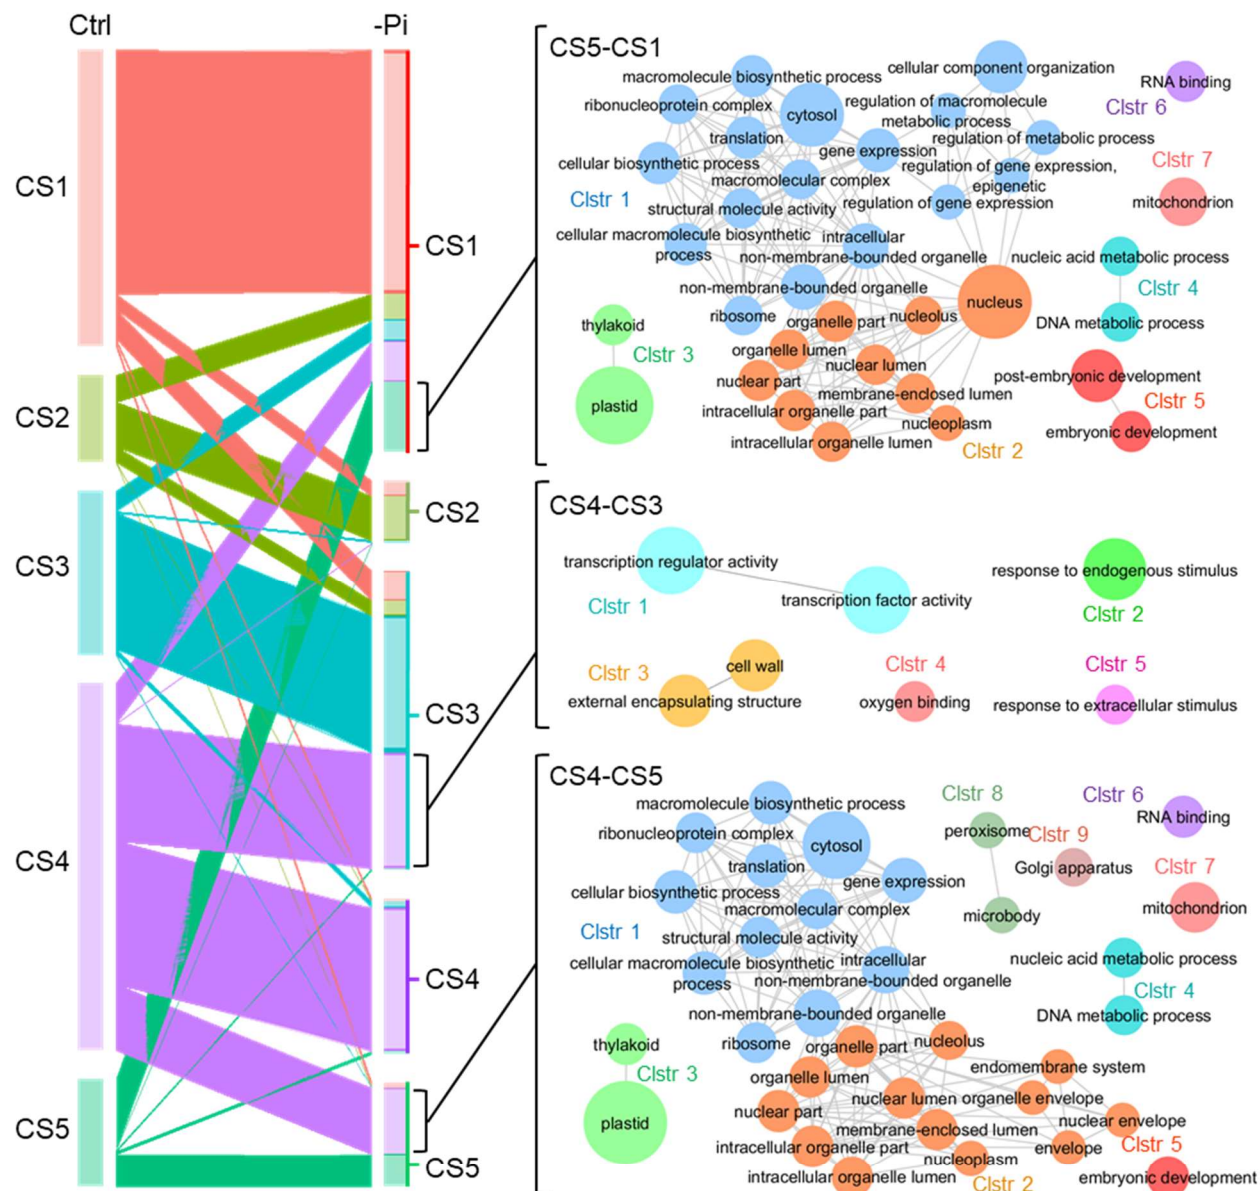

Figure 4. Chromatin state (CS) transitions of protein-coding genes from control (Ctrl) to Pi deficiency (-Pi) conditions. (Left) The size of the segment represents the number of gene in each CS and the width of the ribbons represent the number of genes with a transition to another CS. (Right) Networks representing Gene Ontology Markov Clustering (GOMCL) terms enriched in CS5-CS1, CS4-CS3 and CS4-CS5 groups. Cytoscape was used to visualize enriched GO terms.

983

984

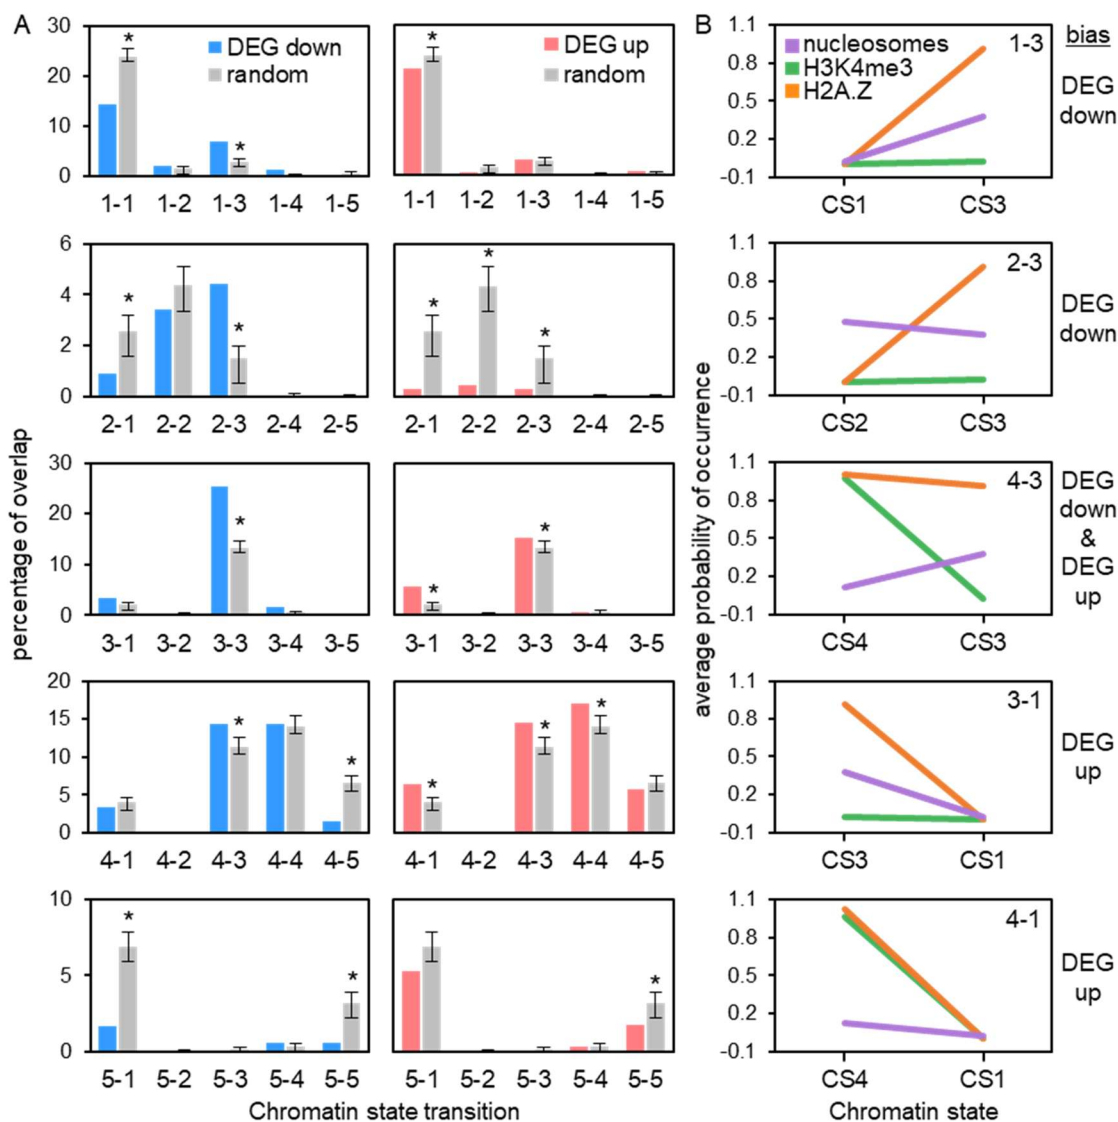

Figure 5. Chromatin state (CS) transitions are associated with differentially-expressed genes (DEGs) under phosphate deficiency. (A) Bootstrapping analysis showing the overlap between genes exhibiting chromatin state transitions and down-regulated or up-regulated genes in response to Pi deficiency. Data are means ( $\pm$ SD) for 1000 iterations. (B) Values are the average probability of each chromatin mark at the CS shown. The category of DEG (up or down) that is biased to the CS is shown at right.

985

986



987

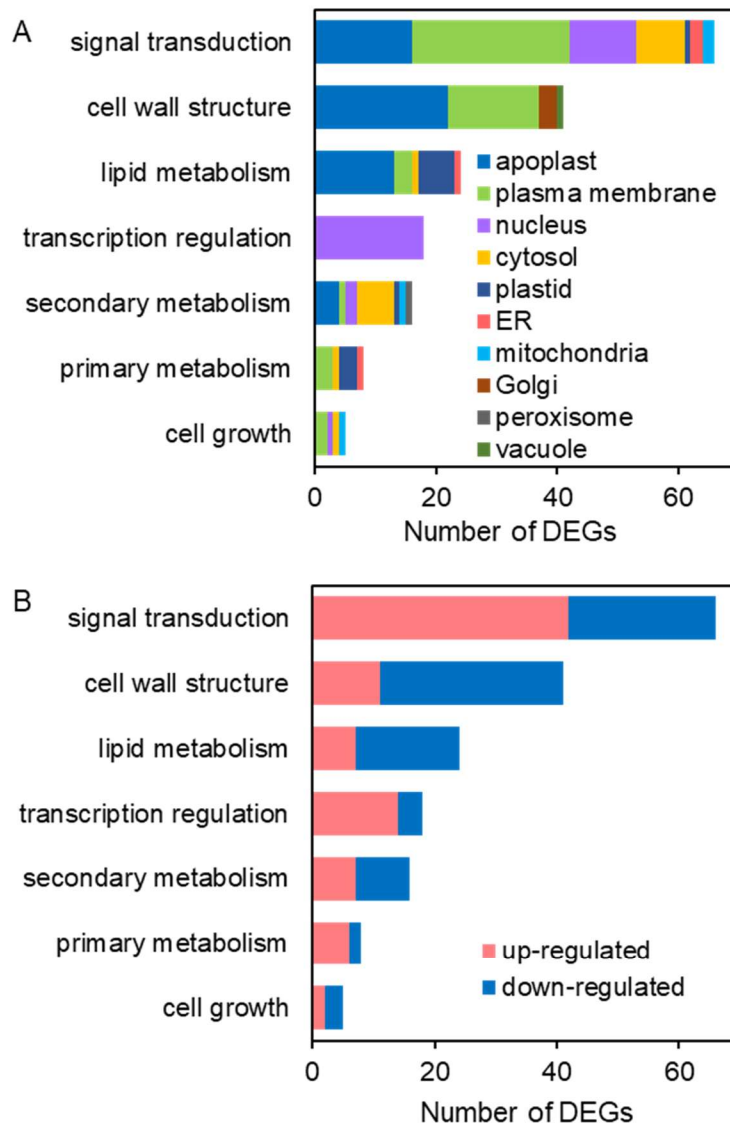

Figure 6. Predicted functions and subcellular locations of differentially-expressed genes (DEGs) having a chromatin state (CS) transition of CS4 to CS3.

988

989

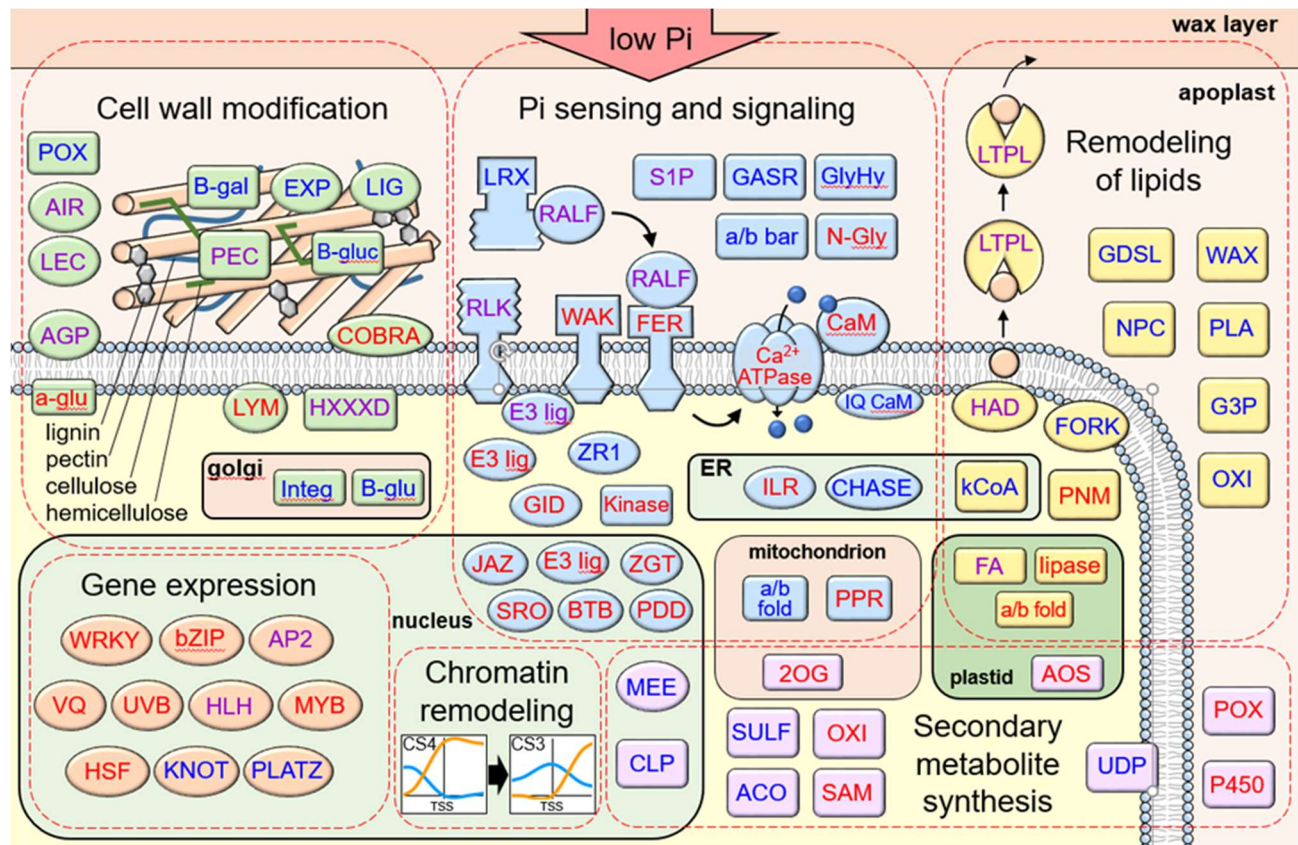

990

991

992 Figure 7. Predicted interactions and functions of differentially-expressed genes having a chromatin state  
 993 (CS) transition of CS4 to CS3. Abbreviations: 2OG, 2OG-Fe oxygenase; a/b bar, A/B barrel; a/b fold,  
 994 alpha/beta fold hydrolase; ACO, 1-aminocyclopropane-1-carboxylate oxidase; a-glu, heparan-alpha-  
 995 glucosaminide N-acetyltransferase; AGP, arabinogalactan protein; AIR, auxin response protein; AOS,  
 996 allene oxide synthase; AP2; B-gal, beta-galactosidase; B-glu, Beta glucan synthase; B-glu,  
 997 glucuronidase; BTB, Bric-a-Brac, Tramtrack, Broad Complex protein; bZIP; Ca ATPase; CaM, Calmodulin-  
 998 related calcium sensor; CHASE; CLP, ATP-dependent caseinolytic protease/crotonase; COBRA, AtCOBRA-  
 999 like; E3 lig, ubiquitin ligase; EXP, expansin; FA, fatty acid hydroxylase; FER, AtFERONIA ortholog; FORK,  
 1000 FORKED1-like; G3P, glycerol-3-phosphate acyltransferase; GASR, GASA/GAST/Snakin; GDSL, GDSL-like  
 1001 lipase/acylhydrolase; GID, gibberellin receptor; GlyHy, glycosyl hydrolase; HAD, HAD  
 1002 phosphoethanolamine/phosphocholine phosphatase; HLH; HLH helix-loop-helix transcription factor;  
 1003 HSF, heat shock factor; HXXXD, HXXXD-type acyl-transferase; ILR, IAA-amino acid hydrolase; Integ, cell  
 1004 wall integrity protein; IQ CaM, IQ calmodulin-binding motif protein; JAZ, ZIM domain-containing JAZ  
 1005 protein; kCoA, 3-ketoacyl-CoA synthase; kinase; KNOT, knotted-1-like homeobox protein; LIG, lignin  
 1006 dirigent; lipase; LRX, leucine-rich repeat extensin; LTPL, Protease inhibitor/seed storage/LTP protein;  
 1007 LYM, lysM domain-containing GPI-anchored protein; MEE, maternal effect embryo arrest; MYB; N-Gly,  
 1008 shiga/ricin-like N-glycosidase; NPC, non-specific phospholipase; OXI, oxidoreductase; P450, cytochrome  
 1009 P450; PDD, PD-(D/E)XK nuclease superfamily protein; PEC, pectinase; PLA, phospholipase A; PLATZ;  
 1010 PNM, phosphoethanolamine N-methyltransferase; POX, peroxidase; PPR, pentatricopeptide repeat  
 1011 protein; RALF, Rapid Alkalinization Factor ; RLK, receptor-like kinase; S1P, Subtilisin Site-1 Protease;

1012 SAM, S-adenosyl-L-methionine-dependent methyltransferases; SRO, OsSRO1c; SULF, sulfotransferase;  
1013 UDP, UDP-glucuronosyl/UDP-glucosyltransferase; UVB, ultraviolet-B-repressible protein; VQ, VQ domain  
1014 containing protein; WAK, wall-associated kinase; WAX, WAX2-like; WRKY; ZGT, ZGT circadian clock  
1015 coupling factor; ZR1, FYVE zinc finger domain protein.
